# Supplementary material for: Exploring the interactions among SNARC effect, finger counting direction and embodied cognition
Source: PeerJ. 2020 May 12;8:e9155. doi: 10.7717/peerj.9155 (PMC7227642; doi:10.7717/peerj.9155)
Supplement: Data S1 [file peerj-08-9155-s001.xls]

## Sheet: Exp2
ANOVA 1: ARABIC CODE						Captions		ANOVA 2: FINGER CONFIGURATION STIMULI
Participants	LA-LH	LA-RH	SM-LH	SM-RH		SM=smaller numbers (1,2)		Participants	l_DW_LA_LH	l_DW_LA_RH	l_DW_SM_LH	l_DW_SM_RH	l_UP_LA_LH	l_UP_LA_RH	l_UP_SM_LH	l_UP_SM_RH	r_DW_LA_LH	r_DW_LA_RH	r_DW_SM_LH	r_DW_SM_RH	r_UP_LA_LH	r_UP_LA_RH	r_UP_SM_LH	r_UP_SM_RH
1	692.383	708.15	637.087	696.668		LA=larger numbers (4,5)		1	681.35	659.9	707.5	689.05	712.426	662.975	684.889	681	715.691	715.4	704.972	653.883	710.789	718.333	674.078	685.417
2	824	859.6	878.8	843.889		LH=Left responding Hand		2	856.9	866.428	820.4	917.833	937.639	843.556	906.722	908.6	920.667	915.146	901.139	912.006	913.55	804.25	963.688	1070.24
3	951.54	770.139	766.222	978.133		RH=Right responding Hand		3	1018.06	766.597	772.444	884.565	1000.97	821.3	765.2	925.689	867.2	774.319	801.679	714.133	823.264	856.021	730.836	702.033
4	789.414	641.322	776.96	775.389		l=Left depicted hand		4	780.239	839.742	686.95	770.106	1047.06	735.062	703.15	789.444	853.8	880.231	763.35	747.384	914.539	815.051	769.972	818.325
5	611.358	531.75	564.522	577.817		r=Right depicted hand		5	532.1	638.737	578.322	573.15	577.402	520.75	602.903	632.725	593.083	600.444	581.926	579.818	545.284	609.986	616.575	577.1
6	824.008	665.65	650.906	734.95		DW=Palm-Down hand posture		6	702.436	682.75	745.25	715.256	699.15	696.722	641.85	705.65	731.981	681.872	696.95	703.333	734.869	687.444	738.567	758.594
7	573.337	522.95	530.4	610.771		UP=Palm-Up hand posture		7	586.456	608.289	638.18	570	568.933	576	601.533	588.138	551.439	597.75	643.157	550.15	590.806	598.483	677.312	611.358
8	631.347	549.583	558.95	598.333				8	654.416	677.15	615.898	620.362	586	541.661	676.55	569.95	614.85	588.229	612.475	590.75	584.267	614.389	609.95	658.5
9	599.062	523.25	547.6	628.742		Each cell contains IES		9	649.167	637.046	614.064	570.333	553.983	520.589	582.281	676.905	602.586	550.778	630.261	566.517	561.922	596.85	636.358	629.028
10	640.994	547.46	545.1	554.644		(Inverse Efficiecy Scores)		10	641.497	590.7	565	620.268	571.35	506.717	550.294	711.05	561.85	574.6	538.3	572.778	558.222	563.956	609.236	611.056
11	639.722	475.7	516.617	618.811				11	529.15	623.395	557.907	574.138	522.067	518.75	531.911	809.732	548.556	546.013	594.5	535.406	513.333	537.294	554.873	636.404
12	658.561	527.511	543.339	674.548				12	571.2	622.741	585.347	606.1	602.338	516.25	593.675	597.278	577.627	575.55	620.25	541.606	540.5	599.781	764.833	658.736
13	591.623	541.6	547	721.775				13	738.014	552.3	703.271	623.375	607.85	537.1	593.198	682.536	636.268	574.554	608.478	573.417	556.639	583.483	645.5	797.125
14	625.723	516.05	568.487	633.597				14	645.259	614.85	573.688	635.358	582.9	541.378	642.778	650.4	581.567	582.444	657.692	577.167	585.352	591.05	680.383	643.571
15	558.3	508.639	528.222	681.03				15	548.7	555.944	611.125	567.3	543.75	551.928	657.238	723.481	575.596	604.317	684.865	546.938	563.25	602.138	582.544	612.228
16	531.833	485.728	517.583	552.58				16	499.35	499.9	516.767	549	522.55	462.4	493.232	658.638	554.599	514.067	538.306	530.725	520.95	516.642	577.888	575.289
17	506.911	422.833	479.792	606.355				17	459.8	569.136	573.136	501.35	568.127	486.031	500.65	561.45	486.9	514.178	610.911	555.353	466.462	526.44	607.892	596.66
18	589.006	482	579.082	518.35				18	474.2	624.51	599.044	604.075	558.171	532.643	535.172	740.547	585.254	599.793	581.236	595.578	580.769	506.011	601.269	536.222
19	784.794	704.459	554.004	700.375				19	689.033	713.721	723.334	649.012	691.891	641.278	617.654	698.534	747.405	632.431	791.99	659.003	661.123	632.617	677.092	786.038
20	487.65	447.3	454.45	476.211				20	472.351	503.862	534.663	578.789	473.778	444.9	462.85	583.301	466.938	462.5	524.556	480.472	442.7	511.08	533.913	487
21	490.278	485.128	498.983	550.578				21	502	515	514.483	520.944	543.923	498.2	512.263	579.669	517.05	525.078	545.809	492.25	578.228	523.15	639.193	500.25
22	531.16	473.444	498.206	514.45				22	503.188	559.609	574.66	586.616	552.821	480.683	564.978	520.239	544.589	479.111	545.95	541.8	539.241	546.506	557.87	547.1
23	585.667	434.544	483.178	558.331				23	476.406	505.239	559.371	539.141	488.65	505.147	524.611	576.091	500.062	580.988	531.449	540.584	509.3	484.4	573.604	507.66
24	756.293	632.5	749.381	672.985				24	713.819	621.562	703.077	682.517	718.333	754.756	671.268	693.05	646.8	647.3	644.85	730.349	736.944	763.207	681.5	811.31
25	642.036	578.956	570.25	639.071				25	600.993	614.15	601.333	612.706	728.939	580.8	714.622	676.141	625.85	630.556	692.814	741.695	619.5	644.4	729.628	648.299
26	643.75	496.536	471.875	535.944				26	534.816	533.29	573.444	574.74	489.778	451.65	477.3	649.403	537.407	530.432	539.877	573.441	541.389	538.086	798.92	574.889
27	752.136	521.433	562.264	596.156				27	632.144	545.9	604.95	590.611	602.25	579.367	565.05	768.938	713.003	547.6	572.811	559.85	571.589	533.9	693.413	570.789
28	1000.57	805.641	592.358	848.563				28	823.944	767.364	808.879	687.05	853.538	771.657	990.816	875.848	705.977	825.5	698.111	707.06	712.389	714.15	710.815	835.851
29	850.05	821.1	899.75	898.9				29	865.2	875.35	948.238	813.7	823.75	841	1067.35	902.35	888.667	815.456	896	867.85	987.415	850	911.286	825.646
30	796.935	587.6	590.719	646.481				30	710.931	644.15	620.42	633.3	649.336	639.7	738.879	614.35	696.907	618.444	645.993	649.802	671.25	668.306	664.544	663.646
31	758.45	715.4	685.156	749.778				31	839.595	734.489	735.6	736.606	843.758	667.65	718.489	723.9	733.433	787.089	782.55	753.747	755.9	712.638	758.167	804.881
32	700.804	604.578	705.498	629.681				32	602.662	673.189	645.431	801.295	683.627	650.599	679.875	601.525	715.664	680.069	674.568	768.916	612.931	646.991	729.184	702.491
33	629.05	654.615	595.952	632.833				33	738.704	632.3	708.704	653.681	705.194	706.67	602.722	665.183	734.198	677.317	783.457	599.073	717.27	696.571	662.8	751.357
34	603.986	513.15	560.15	618.951				34	526.319	630.311	502.072	589	582.789	508.9	594.65	635.603	532.625	575.928	553.492	541.95	486.644	570.1	588.211	594.091
35	611.05	607.3	625.311	736.179				35	582.8	636.113	683.5	606.224	640.538	596.461	605.25	653.163	606.283	692.963	672.35	635.9	673.7	652.803	699.974	638.35
36	619.678	544.461	583.444	586.175				36	579.8	579.65	588.1	611.85	643.068	568.683	580.65	627.705	636.291	584.278	613.387	557.362	623.8	529.675	706.25	607.528
37	546.2	535.2	569.367	585.167				37	562.978	549.85	577.744	584.15	557.05	515.6	552.95	642.238	568.556	555.006	579.875	640.685	549.194	558.383	601.722	588.222
38	595.972	502.5	602.55	618.667				38	559.65	600.778	639.331	632.656	598.7	590.788	576.95	662.656	589.219	562.222	641.011	571.8	579.95	590.611	664.889	649.363
39	573.931	446.7	452.55	473.363				39	465.1	606.389	498.16	521.25	474.111	463.617	593.166	555.753	505.586	517.335	505.5	527.465	457.117	480.678	545.625	502.178
40	546.2	481.867	495.722	608.529				40	491	624.382	707.377	587.285	566.856	503.55	543.792	661.938	496.6	536.872	631.188	698.373	508.65	578.725	615.339	653.409
41	565.731	439.95	471.85	541.654				41	582.893	573.016	525.65	513.405	491.55	493.8	509.812	541.685	554.4	546.614	503.812	544.093	480.489	489.017	505.756	605.772
42	568.631	456.9	484.9	525.469				42	526.601	526.35	530.682	507.972	514.3	457.35	527.35	612.2	538.511	491.767	576.682	497.837	493.25	551.639	671.261	580.509
43	552.311	541	527.35	538.222				43	611.068	561.5	559.85	605.5	547.222	604.796	583.783	579.45	616.5	548.5	556.4	522.65	548.056	603.58	594.233	531.663
44	564.812	425.65	442.711	532.16				44	510.751	476.9	531.62	516.931	482.183	443.75	496.817	571.978	473.389	505.747	507.667	485.444	521.844	495.478	498.727	570.594
45	516.352	439.65	432.2	542.062				45	467.75	520.45	588.764	582.32	573.891	442.5	485.611	564.111	490.818	499.498	487.45	479.922	465.75	490.175	516.725	502.125
46	554.233	466.028	466.95	500.378				46	555.587	522.235	495.7	508.65	609.29	497.572	519.894	612.3	548.139	499.844	507.691	534.525	521.228	515.2	514.55	539.869

## Sheet: RawData
Subject	Session	Age	Sex	Num	Hand	Pos	Mag	Type	CORR_R	ST.RESP	ACCURACY	RT		Captions
1	1	22	female	2	L	UP	S	even	c	c	1	1189		Subject	number of participant
1	1	22	female	2	L	UP	S	even	c	c	1	886		Session	number of session
1	1	22	female	2	L	UP	S	even	c	c	1	1119		Age	participant's age
1	1	22	female	2	L	UP	S	even	c	c	1	889		Sex	gender of participant
1	1	22	female	2	L	UP	S	even	c	c	1	673		Num	number represented in the stimulus (1, 2, 4, 5)
1	1	22	female	2	L	UP	S	even	c	c	1	667		Hand	depected hand = L: Left; R: Right; NO: Arabic code (no depicted hand)
1	1	22	female	2	L	UP	S	even	c	c	1	634		Pos	Position of the depected hand: UP: palm-up; DW: palm-down; NO: Arabic code
1	1	22	female	2	L	UP	S	even	c	c	1	572		Mag	Magnitude: S: small; L: large
1	1	22	female	2	L	UP	S	even	c	c	1	672		Type	even; odd
1	1	22	female	2	L	UP	S	even	c	c	1	689		CORR_R	Correct Response
1	1	22	female	1	L	UP	S	odd	m	m	1	1049		ST.RESP	Response given by the participant
1	1	22	female	1	L	UP	S	odd	m	m	1	699		ACCURACY	1=correct response; 0= incorrect response
1	1	22	female	1	L	UP	S	odd	m	m	1	835		RT	response time (ms)
1	1	22	female	1	L	UP	S	odd	m	m	1	645
1	1	22	female	1	L	UP	S	odd	m	m	1	804			Participants 36 and 42 excluded because left-starters
1	1	22	female	1	L	UP	S	odd	m	m	1	687
1	1	22	female	1	L	UP	S	odd	m	m	1	733
1	1	22	female	1	L	UP	S	odd	m	m	1	740
1	1	22	female	1	L	UP	S	odd	m	m	1	661
1	1	22	female	1	L	UP	S	odd	m	m	1	628
1	1	22	female	4	L	UP	L	even	c	c	1	698
1	1	22	female	4	L	UP	L	even	c	c	1	1021
1	1	22	female	4	L	UP	L	even	c	c	1	1105
1	1	22	female	4	L	UP	L	even	c	c	1	559
1	1	22	female	4	L	UP	L	even	c	c	1	719
1	1	22	female	4	L	UP	L	even	c	c	1	917
1	1	22	female	4	L	UP	L	even	c	c	1	718
1	1	22	female	4	L	UP	L	even	c	c	1	594
1	1	22	female	4	L	UP	L	even	c	c	1	971
1	1	22	female	4	L	UP	L	even	c	c	1	608
1	1	22	female	5	L	UP	L	odd	m	m	1	1397
1	1	22	female	5	L	UP	L	odd	m	m	1	591
1	1	22	female	5	L	UP	L	odd	m	m	1	681
1	1	22	female	5	L	UP	L	odd	m	m	1	629
1	1	22	female	5	L	UP	L	odd	m	m	1	816
1	1	22	female	5	L	UP	L	odd	m	m	1	702
1	1	22	female	5	L	UP	L	odd	m	m	1	682
1	1	22	female	5	L	UP	L	odd	m	m	1	813
1	1	22	female	5	L	UP	L	odd	m	m	1	453
1	1	22	female	5	L	UP	L	odd	m	m	1	702
1	1	22	female	2	L	DW	S	even	c	c	1	835
1	1	22	female	2	L	DW	S	even	c	c	1	953
1	1	22	female	2	L	DW	S	even	c	c	1	687
1	1	22	female	2	L	DW	S	even	c	c	1	709
1	1	22	female	2	L	DW	S	even	c	c	1	743
1	1	22	female	2	L	DW	S	even	c	c	1	824
1	1	22	female	2	L	DW	S	even	c	c	1	471
1	1	22	female	2	L	DW	S	even	c	c	1	696
1	1	22	female	2	L	DW	S	even	c	c	1	617
1	1	22	female	2	L	DW	S	even	c	c	1	645
1	1	22	female	1	L	DW	S	odd	m	m	1	749
1	1	22	female	1	L	DW	S	odd	m	m	1	674
1	1	22	female	1	L	DW	S	odd	m	m	1	572
1	1	22	female	1	L	DW	S	odd	m	m	1	657
1	1	22	female	1	L	DW	S	odd	m	m	1	624
1	1	22	female	1	L	DW	S	odd	m	c	0	525
1	1	22	female	1	L	DW	S	odd	m	m	1	598
1	1	22	female	1	L	DW	S	odd	m	m	1	624
1	1	22	female	1	L	DW	S	odd	m	m	1	465
1	1	22	female	1	L	DW	S	odd	m	m	1	794
1	1	22	female	4	L	DW	L	even	c	c	1	668
1	1	22	female	4	L	DW	L	even	c	c	1	595
1	1	22	female	4	L	DW	L	even	c	c	1	627
1	1	22	female	4	L	DW	L	even	c	c	1	599
1	1	22	female	4	L	DW	L	even	c	c	1	623
1	1	22	female	4	L	DW	L	even	c	c	1	795
1	1	22	female	4	L	DW	L	even	c	c	1	765
1	1	22	female	4	L	DW	L	even	c	c	1	707
1	1	22	female	4	L	DW	L	even	c	c	1	748
1	1	22	female	4	L	DW	L	even	c	c	1	610
1	1	22	female	5	L	DW	L	odd	m	m	1	640
1	1	22	female	5	L	DW	L	odd	m	m	1	519
1	1	22	female	5	L	DW	L	odd	m	m	1	613
1	1	22	female	5	L	DW	L	odd	m	m	1	746
1	1	22	female	5	L	DW	L	odd	m	m	1	530
1	1	22	female	5	L	DW	L	odd	m	m	1	513
1	1	22	female	5	L	DW	L	odd	m	m	1	527
1	1	22	female	5	L	DW	L	odd	m	m	1	680
1	1	22	female	5	L	DW	L	odd	m	m	1	844
1	1	22	female	5	L	DW	L	odd	m	m	1	743
1	1	22	female	2	R	UP	S	even	c	c	1	743
1	1	22	female	2	R	UP	S	even	c	c	1	564
1	1	22	female	2	R	UP	S	even	c	c	1	494
1	1	22	female	2	R	UP	S	even	c	c	1	724
1	1	22	female	2	R	UP	S	even	c	c	1	659
1	1	22	female	2	R	UP	S	even	c	c	1	545
1	1	22	female	2	R	UP	S	even	c	c	1	624
1	1	22	female	2	R	UP	S	even	c	c	1	780
1	1	22	female	2	R	UP	S	even	c	c	1	759
1	1	22	female	2	R	UP	S	even	c	c	1	594
1	1	22	female	1	R	UP	S	odd	m	m	1	1057
1	1	22	female	1	R	UP	S	odd	m	m	1	827
1	1	22	female	1	R	UP	S	odd	m	m	1	800
1	1	22	female	1	R	UP	S	odd	m	m	1	542
1	1	22	female	1	R	UP	S	odd	m	m	1	682
1	1	22	female	1	R	UP	S	odd	m	m	1	621
1	1	22	female	1	R	UP	S	odd	m	m	1	771
1	1	22	female	1	R	UP	S	odd	m	m	1	720
1	1	22	female	1	R	UP	S	odd	m	m	1	583
1	1	22	female	1	R	UP	S	odd	m	m	1	730
1	1	22	female	4	R	UP	L	even	c	c	1	789
1	1	22	female	4	R	UP	L	even	c	c	1	593
1	1	22	female	4	R	UP	L	even	c	c	1	901
1	1	22	female	4	R	UP	L	even	c	c	1	830
1	1	22	female	4	R	UP	L	even	c	c	1	669
1	1	22	female	4	R	UP	L	even	c	c	1	811
1	1	22	female	4	R	UP	L	even	c	c	1	778
1	1	22	female	4	R	UP	L	even	c	c	1	724
1	1	22	female	4	R	UP	L	even	c	c	1	631
1	1	22	female	4	R	UP	L	even	c	c	1	712
1	1	22	female	5	R	UP	L	odd	m	m	1	713
1	1	22	female	5	R	UP	L	odd	m	m	1	748
1	1	22	female	5	R	UP	L	odd	m	c	0	933
1	1	22	female	5	R	UP	L	odd	m	m	1	617
1	1	22	female	5	R	UP	L	odd	m	m	1	540
1	1	22	female	5	R	UP	L	odd	m	m	1	539
1	1	22	female	5	R	UP	L	odd	m	m	1	850
1	1	22	female	5	R	UP	L	odd	m	m	1	1114
1	1	22	female	5	R	UP	L	odd	m	m	1	649
1	1	22	female	5	R	UP	L	odd	m	m	1	812
1	1	22	female	2	R	DW	S	even	c	c	1	962
1	1	22	female	2	R	DW	S	even	c	c	1	678
1	1	22	female	2	R	DW	S	even	c	c	1	607
1	1	22	female	2	R	DW	S	even	c	c	1	769
1	1	22	female	2	R	DW	S	even	c	c	1	730
1	1	22	female	2	R	DW	S	even	c	c	1	554
1	1	22	female	2	R	DW	S	even	c	c	1	811
1	1	22	female	2	R	DW	S	even	c	c	1	789
1	1	22	female	2	R	DW	S	even	c	c	1	765
1	1	22	female	2	R	DW	S	even	c	c	1	600
1	1	22	female	1	R	DW	S	odd	m	m	1	996
1	1	22	female	1	R	DW	S	odd	m	m	1	705
1	1	22	female	1	R	DW	S	odd	m	m	1	553
1	1	22	female	1	R	DW	S	odd	m	m	1	874
1	1	22	female	1	R	DW	S	odd	m	m	1	539
1	1	22	female	1	R	DW	S	odd	m	m	1	602
1	1	22	female	1	R	DW	S	odd	m	m	1	778
1	1	22	female	1	R	DW	S	odd	m	m	1	743
1	1	22	female	1	R	DW	S	odd	m	m	1	545
1	1	22	female	1	R	DW	S	odd	m	m	1	636
1	1	22	female	4	R	DW	L	even	c	c	1	709
1	1	22	female	4	R	DW	L	even	c	c	1	733
1	1	22	female	4	R	DW	L	even	c	c	1	731
1	1	22	female	4	R	DW	L	even	c	c	1	459
1	1	22	female	4	R	DW	L	even	c	c	1	825
1	1	22	female	4	R	DW	L	even	c	c	1	679
1	1	22	female	4	R	DW	L	even	c	c	1	752
1	1	22	female	4	R	DW	L	even	c	c	1	607
1	1	22	female	4	R	DW	L	even	c	c	1	520
1	1	22	female	4	R	DW	L	even	c	c	1	684
1	1	22	female	5	R	DW	L	odd	m	m	1	903
1	1	22	female	5	R	DW	L	odd	m	m	1	806
1	1	22	female	5	R	DW	L	odd	m	m	1	960
1	1	22	female	5	R	DW	L	odd	m	m	1	629
1	1	22	female	5	R	DW	L	odd	m	m	1	497
1	1	22	female	5	R	DW	L	odd	m	m	1	466
1	1	22	female	5	R	DW	L	odd	m	m	1	590
1	1	22	female	5	R	DW	L	odd	m	m	1	710
1	1	22	female	5	R	DW	L	odd	m	m	1	756
1	1	22	female	5	R	DW	L	odd	m	m	1	948
1	1	22	female	2	NO	NO	S	even	c	c	1	812
1	1	22	female	2	NO	NO	S	even	c	c	1	589
1	1	22	female	2	NO	NO	S	even	c	c	1	650
1	1	22	female	2	NO	NO	S	even	c	c	1	1088
1	1	22	female	2	NO	NO	S	even	c	c	1	1078
1	1	22	female	2	NO	NO	S	even	c	c	1	506
1	1	22	female	2	NO	NO	S	even	c	c	1	729
1	1	22	female	2	NO	NO	S	even	c	c	1	1069
1	1	22	female	2	NO	NO	S	even	c	c	1	700
1	1	22	female	2	NO	NO	S	even	c	c	1	622
1	1	22	female	1	NO	NO	S	odd	m	m	1	1102
1	1	22	female	1	NO	NO	S	odd	m	m	1	570
1	1	22	female	1	NO	NO	S	odd	m	m	1	514
1	1	22	female	1	NO	NO	S	odd	m	m	1	610
1	1	22	female	1	NO	NO	S	odd	m	m	1	594
1	1	22	female	1	NO	NO	S	odd	m	m	1	720
1	1	22	female	1	NO	NO	S	odd	m	m	1	760
1	1	22	female	1	NO	NO	S	odd	m	m	1	798
1	1	22	female	1	NO	NO	S	odd	m	m	1	618
1	1	22	female	1	NO	NO	S	odd	m	m	1	600
1	1	22	female	4	NO	NO	L	even	c	c	1	830
1	1	22	female	4	NO	NO	L	even	c	c	1	764
1	1	22	female	4	NO	NO	L	even	c	c	1	630
1	1	22	female	4	NO	NO	L	even	c	c	1	682
1	1	22	female	4	NO	NO	L	even	c	c	1	626
1	1	22	female	4	NO	NO	L	even	c	c	1	541
1	1	22	female	4	NO	NO	L	even	c	c	1	680
1	1	22	female	4	NO	NO	L	even	c	c	1	766
1	1	22	female	4	NO	NO	L	even	c	c	1	610
1	1	22	female	4	NO	NO	L	even	c	c	1	555
1	1	22	female	5	NO	NO	L	odd	m	m	1	619
1	1	22	female	5	NO	NO	L	odd	m	m	1	577
1	1	22	female	5	NO	NO	L	odd	m	m	1	554
1	1	22	female	5	NO	NO	L	odd	m	m	1	540
1	1	22	female	5	NO	NO	L	odd	m	m	1	532
1	1	22	female	5	NO	NO	L	odd	m	m	1	519
1	1	22	female	5	NO	NO	L	odd	m	m	1	704
1	1	22	female	5	NO	NO	L	odd	m	m	1	627
1	1	22	female	5	NO	NO	L	odd	m	m	1	609
1	1	22	female	5	NO	NO	L	odd	m	m	1	521
2	1	22	female	2	L	UP	S	even	c	c	1	1609
2	1	22	female	2	L	UP	S	even	c	c	1	849
2	1	22	female	2	L	UP	S	even	c	c	1	755
2	1	22	female	2	L	UP	S	even	c	c	1	693
2	1	22	female	2	L	UP	S	even	c	c	1	846
2	1	22	female	2	L	UP	S	even	c	c	1	3140
2	1	22	female	2	L	UP	S	even	c	c	1	870
2	1	22	female	2	L	UP	S	even	c	c	1	894
2	1	22	female	2	L	UP	S	even	c	c	1	935
2	1	22	female	2	L	UP	S	even	c	c	1	877
2	1	22	female	1	L	UP	S	odd	m	m	1	2534
2	1	22	female	1	L	UP	S	odd	m	m	1	2180
2	1	22	female	1	L	UP	S	odd	m	m	1	874
2	1	22	female	1	L	UP	S	odd	m	m	1	865
2	1	22	female	1	L	UP	S	odd	m	m	1	1416
2	1	22	female	1	L	UP	S	odd	m	m	1	989
2	1	22	female	1	L	UP	S	odd	m	m	1	717
2	1	22	female	1	L	UP	S	odd	m	m	1	1051
2	1	22	female	1	L	UP	S	odd	m	m	1	767
2	1	22	female	1	L	UP	S	odd	m	m	1	843
2	1	22	female	4	L	UP	L	even	c	c	1	1036
2	1	22	female	4	L	UP	L	even	c	c	1	716
2	1	22	female	4	L	UP	L	even	c	c	1	776
2	1	22	female	4	L	UP	L	even	c	c	1	689
2	1	22	female	4	L	UP	L	even	c	c	1	1858
2	1	22	female	4	L	UP	L	even	c	c	1	892
2	1	22	female	4	L	UP	L	even	c	c	1	802
2	1	22	female	4	L	UP	L	even	c	c	1	959
2	1	22	female	4	L	UP	L	even	c	c	1	1141
2	1	22	female	4	L	UP	L	even	c	c	1	777
2	1	22	female	5	L	UP	L	odd	m	m	1	1039
2	1	22	female	5	L	UP	L	odd	m	m	1	1201
2	1	22	female	5	L	UP	L	odd	m	m	1	813
2	1	22	female	5	L	UP	L	odd	m	m	1	1405
2	1	22	female	5	L	UP	L	odd	m	m	1	740
2	1	22	female	5	L	UP	L	odd	m	m	1	2104
2	1	22	female	5	L	UP	L	odd	m	m	1	896
2	1	22	female	5	L	UP	L	odd	m	m	1	1704
2	1	22	female	5	L	UP	L	odd	m	m	1	856
2	1	22	female	5	L	UP	L	odd	m	m	1	755
2	1	22	female	2	L	DW	S	even	c	c	1	811
2	1	22	female	2	L	DW	S	even	c	c	1	876
2	1	22	female	2	L	DW	S	even	c	c	1	771
2	1	22	female	2	L	DW	S	even	c	c	1	1666
2	1	22	female	2	L	DW	S	even	c	c	1	969
2	1	22	female	2	L	DW	S	even	c	c	1	1086
2	1	22	female	2	L	DW	S	even	c	c	1	751
2	1	22	female	2	L	DW	S	even	c	c	1	916
2	1	22	female	2	L	DW	S	even	c	c	1	895
2	1	22	female	2	L	DW	S	even	c	c	1	801
2	1	22	female	1	L	DW	S	odd	m	m	1	2224
2	1	22	female	1	L	DW	S	odd	m	m	1	1227
2	1	22	female	1	L	DW	S	odd	m	m	1	1173
2	1	22	female	1	L	DW	S	odd	m	m	1	1250
2	1	22	female	1	L	DW	S	odd	m	m	1	1149
2	1	22	female	1	L	DW	S	odd	m	m	1	925
2	1	22	female	1	L	DW	S	odd	m	m	1	820
2	1	22	female	1	L	DW	S	odd	m	m	1	1116
2	1	22	female	1	L	DW	S	odd	m	m	1	767
2	1	22	female	1	L	DW	S	odd	m	m	1	724
2	1	22	female	4	L	DW	L	even	c	c	1	1145
2	1	22	female	4	L	DW	L	even	c	c	1	816
2	1	22	female	4	L	DW	L	even	c	c	1	729
2	1	22	female	4	L	DW	L	even	c	c	1	894
2	1	22	female	4	L	DW	L	even	c	c	1	1072
2	1	22	female	4	L	DW	L	even	c	c	1	2408
2	1	22	female	4	L	DW	L	even	c	c	1	808
2	1	22	female	4	L	DW	L	even	c	c	1	712
2	1	22	female	4	L	DW	L	even	c	c	1	617
2	1	22	female	4	L	DW	L	even	c	c	1	1092
2	1	22	female	5	L	DW	L	odd	m	m	1	2730
2	1	22	female	5	L	DW	L	odd	m	m	1	949
2	1	22	female	5	L	DW	L	odd	m	m	1	1062
2	1	22	female	5	L	DW	L	odd	m	m	1	1018
2	1	22	female	5	L	DW	L	odd	m	m	1	936
2	1	22	female	5	L	DW	L	odd	m	m	1	904
2	1	22	female	5	L	DW	L	odd	m	m	1	988
2	1	22	female	5	L	DW	L	odd	m	m	1	643
2	1	22	female	5	L	DW	L	odd	m	m	1	681
2	1	22	female	5	L	DW	L	odd	m	m	1	1313
2	1	22	female	2	R	UP	S	even	c	c	1	932
2	1	22	female	2	R	UP	S	even	c	c	1	1034
2	1	22	female	2	R	UP	S	even	c	c	1	1039
2	1	22	female	2	R	UP	S	even	c	c	1	937
2	1	22	female	2	R	UP	S	even	c	c	1	768
2	1	22	female	2	R	UP	S	even	c	c	1	999
2	1	22	female	2	R	UP	S	even	c	c	1	1003
2	1	22	female	2	R	UP	S	even	c	c	1	1225
2	1	22	female	2	R	UP	S	even	c	c	1	679
2	1	22	female	2	R	UP	S	even	c	c	1	959
2	1	22	female	1	R	UP	S	odd	m	m	1	2940
2	1	22	female	1	R	UP	S	odd	m	m	1	1699
2	1	22	female	1	R	UP	S	odd	m	m	1	1137
2	1	22	female	1	R	UP	S	odd	m	m	1	1092
2	1	22	female	1	R	UP	S	odd	m	m	1	1068
2	1	22	female	1	R	UP	S	odd	m	m	1	971
2	1	22	female	1	R	UP	S	odd	m	c	0	1195
2	1	22	female	1	R	UP	S	odd	m	m	1	1085
2	1	22	female	1	R	UP	S	odd	m	m	1	1160
2	1	22	female	1	R	UP	S	odd	m	m	1	921
2	1	22	female	4	R	UP	L	even	c	c	1	959
2	1	22	female	4	R	UP	L	even	c	c	1	1119
2	1	22	female	4	R	UP	L	even	c	c	1	767
2	1	22	female	4	R	UP	L	even	c	c	1	1079
2	1	22	female	4	R	UP	L	even	c	c	1	897
2	1	22	female	4	R	UP	L	even	c	c	1	1969
2	1	22	female	4	R	UP	L	even	c	c	1	916
2	1	22	female	4	R	UP	L	even	c	c	1	667
2	1	22	female	4	R	UP	L	even	c	c	1	622
2	1	22	female	4	R	UP	L	even	c	c	1	1216
2	1	22	female	5	R	UP	L	odd	m	m	1	706
2	1	22	female	5	R	UP	L	odd	m	m	1	866
2	1	22	female	5	R	UP	L	odd	m	m	1	634
2	1	22	female	5	R	UP	L	odd	m	m	1	913
2	1	22	female	5	R	UP	L	odd	m	m	1	1010
2	1	22	female	5	R	UP	L	odd	m	m	1	791
2	1	22	female	5	R	UP	L	odd	m	m	1	956
2	1	22	female	5	R	UP	L	odd	m	m	1	648
2	1	22	female	5	R	UP	L	odd	m	m	1	646
2	1	22	female	5	R	UP	L	odd	m	m	1	711
2	1	22	female	2	R	DW	S	even	c	c	1	1143
2	1	22	female	2	R	DW	S	even	c	c	1	785
2	1	22	female	2	R	DW	S	even	c	c	1	1313
2	1	22	female	2	R	DW	S	even	c	c	1	720
2	1	22	female	2	R	DW	S	even	c	c	1	753
2	1	22	female	2	R	DW	S	even	c	c	1	1086
2	1	22	female	2	R	DW	S	even	c	c	1	848
2	1	22	female	2	R	DW	S	even	c	c	1	801
2	1	22	female	2	R	DW	S	even	c	c	1	706
2	1	22	female	2	R	DW	S	even	c	c	1	871
2	1	22	female	1	R	DW	S	odd	m	m	1	4204
2	1	22	female	1	R	DW	S	odd	m	m	1	876
2	1	22	female	1	R	DW	S	odd	m	m	1	890
2	1	22	female	1	R	DW	S	odd	m	m	1	880
2	1	22	female	1	R	DW	S	odd	m	m	1	858
2	1	22	female	1	R	DW	S	odd	m	m	1	1044
2	1	22	female	1	R	DW	S	odd	m	m	1	935
2	1	22	female	1	R	DW	S	odd	m	m	1	1537
2	1	22	female	1	R	DW	S	odd	m	m	1	835
2	1	22	female	1	R	DW	S	odd	m	m	1	989
2	1	22	female	4	R	DW	L	even	c	c	1	1092
2	1	22	female	4	R	DW	L	even	c	c	1	1769
2	1	22	female	4	R	DW	L	even	c	c	1	794
2	1	22	female	4	R	DW	L	even	c	c	1	1427
2	1	22	female	4	R	DW	L	even	c	c	1	710
2	1	22	female	4	R	DW	L	even	c	c	1	720
2	1	22	female	4	R	DW	L	even	c	c	1	1016
2	1	22	female	4	R	DW	L	even	c	c	1	2441
2	1	22	female	4	R	DW	L	even	c	c	1	726
2	1	22	female	4	R	DW	L	even	c	c	1	737
2	1	22	female	5	R	DW	L	odd	m	m	1	1575
2	1	22	female	5	R	DW	L	odd	m	m	1	1022
2	1	22	female	5	R	DW	L	odd	m	m	1	2156
2	1	22	female	5	R	DW	L	odd	m	m	1	1329
2	1	22	female	5	R	DW	L	odd	m	m	1	912
2	1	22	female	5	R	DW	L	odd	m	m	1	632
2	1	22	female	5	R	DW	L	odd	m	m	1	970
2	1	22	female	5	R	DW	L	odd	m	m	1	1175
2	1	22	female	5	R	DW	L	odd	m	m	1	786
2	1	22	female	5	R	DW	L	odd	m	m	1	821
2	1	22	female	2	NO	NO	S	even	c	c	1	1012
2	1	22	female	2	NO	NO	S	even	c	c	1	765
2	1	22	female	2	NO	NO	S	even	c	c	1	859
2	1	22	female	2	NO	NO	S	even	c	c	1	847
2	1	22	female	2	NO	NO	S	even	c	c	1	835
2	1	22	female	2	NO	NO	S	even	c	c	1	1120
2	1	22	female	2	NO	NO	S	even	c	c	1	798
2	1	22	female	2	NO	NO	S	even	c	c	1	640
2	1	22	female	2	NO	NO	S	even	c	c	1	658
2	1	22	female	2	NO	NO	S	even	c	c	1	745
2	1	22	female	1	NO	NO	S	odd	m	m	1	1063
2	1	22	female	1	NO	NO	S	odd	m	m	1	890
2	1	22	female	1	NO	NO	S	odd	m	m	1	663
2	1	22	female	1	NO	NO	S	odd	m	m	1	641
2	1	22	female	1	NO	NO	S	odd	m	m	1	756
2	1	22	female	1	NO	NO	S	odd	m	c	0	658
2	1	22	female	1	NO	NO	S	odd	m	m	1	843
2	1	22	female	1	NO	NO	S	odd	m	m	1	868
2	1	22	female	1	NO	NO	S	odd	m	m	1	837
2	1	22	female	1	NO	NO	S	odd	m	m	1	910
2	1	22	female	4	NO	NO	L	even	c	c	1	1016
2	1	22	female	4	NO	NO	L	even	c	c	1	948
2	1	22	female	4	NO	NO	L	even	c	c	1	863
2	1	22	female	4	NO	NO	L	even	c	c	1	1734
2	1	22	female	4	NO	NO	L	even	c	c	1	739
2	1	22	female	4	NO	NO	L	even	c	c	1	748
2	1	22	female	4	NO	NO	L	even	c	c	1	832
2	1	22	female	4	NO	NO	L	even	c	c	1	926
2	1	22	female	4	NO	NO	L	even	c	c	1	1172
2	1	22	female	4	NO	NO	L	even	c	c	1	629
2	1	22	female	5	NO	NO	L	odd	m	m	1	1068
2	1	22	female	5	NO	NO	L	odd	m	m	1	954
2	1	22	female	5	NO	NO	L	odd	m	m	1	2393
2	1	22	female	5	NO	NO	L	odd	m	m	1	691
2	1	22	female	5	NO	NO	L	odd	m	m	1	862
2	1	22	female	5	NO	NO	L	odd	m	m	1	1017
2	1	22	female	5	NO	NO	L	odd	m	m	1	1172
2	1	22	female	5	NO	NO	L	odd	m	m	1	741
2	1	22	female	5	NO	NO	L	odd	m	m	1	685
2	1	22	female	5	NO	NO	L	odd	m	m	1	1239
3	1	22	female	2	L	UP	S	even	c	c	1	562
3	1	22	female	2	L	UP	S	even	c	c	1	601
3	1	22	female	2	L	UP	S	even	c	c	1	871
3	1	22	female	2	L	UP	S	even	c	c	1	1794
3	1	22	female	2	L	UP	S	even	c	c	1	1477
3	1	22	female	2	L	UP	S	even	c	c	1	842
3	1	22	female	2	L	UP	S	even	c	c	1	772
3	1	22	female	2	L	UP	S	even	c	c	1	541
3	1	22	female	2	L	UP	S	even	c	c	1	720
3	1	22	female	2	L	UP	S	even	c	c	1	875
3	1	22	female	1	L	UP	S	odd	m	m	1	698
3	1	22	female	1	L	UP	S	odd	m	m	1	846
3	1	22	female	1	L	UP	S	odd	m	m	1	655
3	1	22	female	1	L	UP	S	odd	m	m	1	678
3	1	22	female	1	L	UP	S	odd	m	m	1	735
3	1	22	female	1	L	UP	S	odd	m	m	1	786
3	1	22	female	1	L	UP	S	odd	m	m	1	473
3	1	22	female	1	L	UP	S	odd	m	m	1	605
3	1	22	female	1	L	UP	S	odd	m	m	1	586
3	1	22	female	1	L	UP	S	odd	m	m	1	1264
3	1	22	female	4	L	UP	L	even	c	c	1	414
3	1	22	female	4	L	UP	L	even	c	c	1	631
3	1	22	female	4	L	UP	L	even	c	c	1	1060
3	1	22	female	4	L	UP	L	even	c	m	0	776
3	1	22	female	4	L	UP	L	even	c	c	1	767
3	1	22	female	4	L	UP	L	even	c	c	1	1579
3	1	22	female	4	L	UP	L	even	c	c	1	727
3	1	22	female	4	L	UP	L	even	c	c	1	609
3	1	22	female	4	L	UP	L	even	c	c	1	486
3	1	22	female	4	L	UP	L	even	c	c	1	572
3	1	22	female	5	L	UP	L	odd	m	m	1	701
3	1	22	female	5	L	UP	L	odd	m	m	1	1159
3	1	22	female	5	L	UP	L	odd	m	m	1	628
3	1	22	female	5	L	UP	L	odd	m	m	1	653
3	1	22	female	5	L	UP	L	odd	m	m	1	751
3	1	22	female	5	L	UP	L	odd	m	m	1	1685
3	1	22	female	5	L	UP	L	odd	m	m	1	1360
3	1	22	female	5	L	UP	L	odd	m	m	1	758
3	1	22	female	5	L	UP	L	odd	m	m	1	588
3	1	22	female	5	L	UP	L	odd	m	m	1	866
3	1	22	female	2	L	DW	S	even	c	c	1	761
3	1	22	female	2	L	DW	S	even	c	c	1	539
3	1	22	female	2	L	DW	S	even	c	c	1	518
3	1	22	female	2	L	DW	S	even	c	c	1	644
3	1	22	female	2	L	DW	S	even	c	c	1	1083
3	1	22	female	2	L	DW	S	even	c	c	1	692
3	1	22	female	2	L	DW	S	even	c	c	1	1317
3	1	22	female	2	L	DW	S	even	c	c	1	1086
3	1	22	female	2	L	DW	S	even	c	c	1	1223
3	1	22	female	2	L	DW	S	even	c	c	1	710
3	1	22	female	1	L	DW	S	odd	m	m	1	779
3	1	22	female	1	L	DW	S	odd	m	m	1	741
3	1	22	female	1	L	DW	S	odd	m	m	1	577
3	1	22	female	1	L	DW	S	odd	m	m	1	609
3	1	22	female	1	L	DW	S	odd	m	m	1	730
3	1	22	female	1	L	DW	S	odd	m	m	1	724
3	1	22	female	1	L	DW	S	odd	m	m	1	678
3	1	22	female	1	L	DW	S	odd	m	m	1	786
3	1	22	female	1	L	DW	S	odd	m	m	1	642
3	1	22	female	1	L	DW	S	odd	m	m	1	882
3	1	22	female	4	L	DW	L	even	c	c	1	436
3	1	22	female	4	L	DW	L	even	c	c	1	999
3	1	22	female	4	L	DW	L	even	c	c	1	741
3	1	22	female	4	L	DW	L	even	c	c	1	765
3	1	22	female	4	L	DW	L	even	c	c	1	443
3	1	22	female	4	L	DW	L	even	c	c	1	685
3	1	22	female	4	L	DW	L	even	c	c	1	987
3	1	22	female	4	L	DW	L	even	c	c	1	600
3	1	22	female	4	L	DW	L	even	c	c	1	573
3	1	22	female	4	L	DW	L	even	c	c	1	776
3	1	22	female	5	L	DW	L	odd	m	m	1	721
3	1	22	female	5	L	DW	L	odd	m	m	1	575
3	1	22	female	5	L	DW	L	odd	m	m	1	1168
3	1	22	female	5	L	DW	L	odd	m	m	1	876
3	1	22	female	5	L	DW	L	odd	m	m	1	830
3	1	22	female	5	L	DW	L	odd	m	m	1	812
3	1	22	female	5	L	DW	L	odd	m	m	1	864
3	1	22	female	5	L	DW	L	odd	m	m	1	566
3	1	22	female	5	L	DW	L	odd	m	c	0	1048
3	1	22	female	5	L	DW	L	odd	m	m	1	727
3	1	22	female	2	R	UP	S	even	c	c	1	755
3	1	22	female	2	R	UP	S	even	c	c	1	544
3	1	22	female	2	R	UP	S	even	c	c	1	620
3	1	22	female	2	R	UP	S	even	c	c	1	925
3	1	22	female	2	R	UP	S	even	c	c	1	675
3	1	22	female	2	R	UP	S	even	c	c	1	768
3	1	22	female	2	R	UP	S	even	c	c	1	717
3	1	22	female	2	R	UP	S	even	c	c	1	1273
3	1	22	female	2	R	UP	S	even	c	c	1	583
3	1	22	female	2	R	UP	S	even	c	m	0	578
3	1	22	female	1	R	UP	S	odd	m	m	1	627
3	1	22	female	1	R	UP	S	odd	m	m	1	843
3	1	22	female	1	R	UP	S	odd	m	m	1	633
3	1	22	female	1	R	UP	S	odd	m	m	1	726
3	1	22	female	1	R	UP	S	odd	m	m	1	976
3	1	22	female	1	R	UP	S	odd	m	m	1	612
3	1	22	female	1	R	UP	S	odd	m	m	1	724
3	1	22	female	1	R	UP	S	odd	m	m	1	932
3	1	22	female	1	R	UP	S	odd	m	m	1	636
3	1	22	female	1	R	UP	S	odd	m	m	1	675
3	1	22	female	4	R	UP	L	even	c	c	1	947
3	1	22	female	4	R	UP	L	even	c	c	1	889
3	1	22	female	4	R	UP	L	even	c	c	1	517
3	1	22	female	4	R	UP	L	even	c	c	1	544
3	1	22	female	4	R	UP	L	even	c	c	1	632
3	1	22	female	4	R	UP	L	even	c	c	1	709
3	1	22	female	4	R	UP	L	even	c	c	1	621
3	1	22	female	4	R	UP	L	even	c	c	1	482
3	1	22	female	4	R	UP	L	even	c	c	1	629
3	1	22	female	4	R	UP	L	even	c	c	1	805
3	1	22	female	5	R	UP	L	odd	m	m	1	717
3	1	22	female	5	R	UP	L	odd	m	m	1	692
3	1	22	female	5	R	UP	L	odd	m	m	1	741
3	1	22	female	5	R	UP	L	odd	m	m	1	762
3	1	22	female	5	R	UP	L	odd	m	m	1	744
3	1	22	female	5	R	UP	L	odd	m	m	1	684
3	1	22	female	5	R	UP	L	odd	m	c	0	1574
3	1	22	female	5	R	UP	L	odd	m	m	1	678
3	1	22	female	5	R	UP	L	odd	m	m	1	665
3	1	22	female	5	R	UP	L	odd	m	m	1	1233
3	1	22	female	2	R	DW	S	even	c	c	1	532
3	1	22	female	2	R	DW	S	even	c	c	1	1284
3	1	22	female	2	R	DW	S	even	c	c	1	617
3	1	22	female	2	R	DW	S	even	c	c	1	711
3	1	22	female	2	R	DW	S	even	c	c	1	668
3	1	22	female	2	R	DW	S	even	c	c	1	667
3	1	22	female	2	R	DW	S	even	c	c	1	616
3	1	22	female	2	R	DW	S	even	c	c	1	874
3	1	22	female	2	R	DW	S	even	c	c	1	644
3	1	22	female	2	R	DW	S	even	c	c	1	702
3	1	22	female	1	R	DW	S	odd	m	m	1	589
3	1	22	female	1	R	DW	S	odd	m	m	1	782
3	1	22	female	1	R	DW	S	odd	m	m	1	753
3	1	22	female	1	R	DW	S	odd	m	m	1	584
3	1	22	female	1	R	DW	S	odd	m	m	1	669
3	1	22	female	1	R	DW	S	odd	m	m	1	1276
3	1	22	female	1	R	DW	S	odd	m	m	1	569
3	1	22	female	1	R	DW	S	odd	m	m	1	594
3	1	22	female	1	R	DW	S	odd	m	m	1	603
3	1	22	female	1	R	DW	S	odd	m	m	1	614
3	1	22	female	4	R	DW	L	even	c	c	1	822
3	1	22	female	4	R	DW	L	even	c	c	1	537
3	1	22	female	4	R	DW	L	even	c	c	1	590
3	1	22	female	4	R	DW	L	even	c	c	1	659
3	1	22	female	4	R	DW	L	even	c	c	1	944
3	1	22	female	4	R	DW	L	even	c	c	1	605
3	1	22	female	4	R	DW	L	even	c	c	1	574
3	1	22	female	4	R	DW	L	even	c	c	1	770
3	1	22	female	4	R	DW	L	even	c	c	1	878
3	1	22	female	4	R	DW	L	even	c	c	1	571
3	1	22	female	5	R	DW	L	odd	m	m	1	721
3	1	22	female	5	R	DW	L	odd	m	m	1	629
3	1	22	female	5	R	DW	L	odd	m	m	1	586
3	1	22	female	5	R	DW	L	odd	m	m	1	743
3	1	22	female	5	R	DW	L	odd	m	m	1	1185
3	1	22	female	5	R	DW	L	odd	m	m	1	767
3	1	22	female	5	R	DW	L	odd	m	m	1	634
3	1	22	female	5	R	DW	L	odd	m	m	1	613
3	1	22	female	5	R	DW	L	odd	m	m	1	692
3	1	22	female	5	R	DW	L	odd	m	m	1	715
3	1	22	female	2	NO	NO	S	even	c	c	1	899
3	1	22	female	2	NO	NO	S	even	c	c	1	556
3	1	22	female	2	NO	NO	S	even	c	c	1	1700
3	1	22	female	2	NO	NO	S	even	c	c	1	1144
3	1	22	female	2	NO	NO	S	even	c	c	1	707
3	1	22	female	2	NO	NO	S	even	c	c	1	608
3	1	22	female	2	NO	NO	S	even	c	c	1	529
3	1	22	female	2	NO	NO	S	even	c	c	1	492
3	1	22	female	2	NO	NO	S	even	c	c	1	736
3	1	22	female	2	NO	NO	S	even	c	c	1	571
3	1	22	female	1	NO	NO	S	odd	m	m	1	888
3	1	22	female	1	NO	NO	S	odd	m	m	1	686
3	1	22	female	1	NO	NO	S	odd	m	m	1	688
3	1	22	female	1	NO	NO	S	odd	m	m	1	702
3	1	22	female	1	NO	NO	S	odd	m	m	1	569
3	1	22	female	1	NO	NO	S	odd	m	m	1	630
3	1	22	female	1	NO	NO	S	odd	m	m	1	627
3	1	22	female	1	NO	NO	S	odd	m	m	1	604
3	1	22	female	1	NO	NO	S	odd	m	m	1	590
3	1	22	female	1	NO	NO	S	odd	m	m	1	682
3	1	22	female	4	NO	NO	L	even	c	c	1	769
3	1	22	female	4	NO	NO	L	even	c	c	1	1039
3	1	22	female	4	NO	NO	L	even	c	c	1	552
3	1	22	female	4	NO	NO	L	even	c	c	1	603
3	1	22	female	4	NO	NO	L	even	c	c	1	1307
3	1	22	female	4	NO	NO	L	even	c	c	1	519
3	1	22	female	4	NO	NO	L	even	c	c	1	652
3	1	22	female	4	NO	NO	L	even	c	c	1	1213
3	1	22	female	4	NO	NO	L	even	c	m	0	549
3	1	22	female	4	NO	NO	L	even	c	c	1	1120
3	1	22	female	5	NO	NO	L	odd	m	m	1	631
3	1	22	female	5	NO	NO	L	odd	m	m	1	1091
3	1	22	female	5	NO	NO	L	odd	m	m	1	621
3	1	22	female	5	NO	NO	L	odd	m	m	1	590
3	1	22	female	5	NO	NO	L	odd	m	m	1	1114
3	1	22	female	5	NO	NO	L	odd	m	m	1	590
3	1	22	female	5	NO	NO	L	odd	m	m	1	1292
3	1	22	female	5	NO	NO	L	odd	m	m	1	694
3	1	22	female	5	NO	NO	L	odd	m	m	1	612
3	1	22	female	5	NO	NO	L	odd	m	m	1	727
4	1	24	female	2	L	UP	S	even	c	c	1	797
4	1	24	female	2	L	UP	S	even	c	m	0	910
4	1	24	female	2	L	UP	S	even	c	c	1	1519
4	1	24	female	2	L	UP	S	even	c	c	1	848
4	1	24	female	2	L	UP	S	even	c	c	1	615
4	1	24	female	2	L	UP	S	even	c	c	1	669
4	1	24	female	2	L	UP	S	even	c	c	1	708
4	1	24	female	2	L	UP	S	even	c	c	1	1152
4	1	24	female	2	L	UP	S	even	c	c	1	724
4	1	24	female	2	L	UP	S	even	c	c	1	759
4	1	24	female	1	L	UP	S	odd	m	m	1	658
4	1	24	female	1	L	UP	S	odd	m	m	1	657
4	1	24	female	1	L	UP	S	odd	m	m	1	1398
4	1	24	female	1	L	UP	S	odd	m	m	1	561
4	1	24	female	1	L	UP	S	odd	m	m	1	686
4	1	24	female	1	L	UP	S	odd	m	m	1	760
4	1	24	female	1	L	UP	S	odd	m	m	1	544
4	1	24	female	1	L	UP	S	odd	m	m	1	765
4	1	24	female	1	L	UP	S	odd	m	m	1	904
4	1	24	female	1	L	UP	S	odd	m	m	1	840
4	1	24	female	4	L	UP	L	even	c	c	1	1038
4	1	24	female	4	L	UP	L	even	c	c	1	603
4	1	24	female	4	L	UP	L	even	c	c	1	711
4	1	24	female	4	L	UP	L	even	c	c	1	635
4	1	24	female	4	L	UP	L	even	c	c	1	963
4	1	24	female	4	L	UP	L	even	c	c	1	722
4	1	24	female	4	L	UP	L	even	c	c	1	636
4	1	24	female	4	L	UP	L	even	c	c	1	691
4	1	24	female	4	L	UP	L	even	c	c	1	682
4	1	24	female	4	L	UP	L	even	c	c	1	501
4	1	24	female	5	L	UP	L	odd	m	m	1	931
4	1	24	female	5	L	UP	L	odd	m	m	1	625
4	1	24	female	5	L	UP	L	odd	m	m	1	934
4	1	24	female	5	L	UP	L	odd	m	m	1	545
4	1	24	female	5	L	UP	L	odd	m	m	1	928
4	1	24	female	5	L	UP	L	odd	m	m	1	555
4	1	24	female	5	L	UP	L	odd	m	m	1	650
4	1	24	female	5	L	UP	L	odd	m	m	1	1073
4	1	24	female	5	L	UP	L	odd	m	m	1	562
4	1	24	female	5	L	UP	L	odd	m	m	1	636
4	1	24	female	2	L	DW	S	even	c	c	1	679
4	1	24	female	2	L	DW	S	even	c	c	1	797
4	1	24	female	2	L	DW	S	even	c	c	1	1447
4	1	24	female	2	L	DW	S	even	c	c	1	1028
4	1	24	female	2	L	DW	S	even	c	c	1	701
4	1	24	female	2	L	DW	S	even	c	c	1	640
4	1	24	female	2	L	DW	S	even	c	c	1	712
4	1	24	female	2	L	DW	S	even	c	c	1	690
4	1	24	female	2	L	DW	S	even	c	c	1	683
4	1	24	female	2	L	DW	S	even	c	c	1	710
4	1	24	female	1	L	DW	S	odd	m	m	1	663
4	1	24	female	1	L	DW	S	odd	m	m	1	799
4	1	24	female	1	L	DW	S	odd	m	m	1	2151
4	1	24	female	1	L	DW	S	odd	m	m	1	1154
4	1	24	female	1	L	DW	S	odd	m	m	1	685
4	1	24	female	1	L	DW	S	odd	m	m	1	2054
4	1	24	female	1	L	DW	S	odd	m	m	1	1352
4	1	24	female	1	L	DW	S	odd	m	m	1	676
4	1	24	female	1	L	DW	S	odd	m	c	0	523
4	1	24	female	1	L	DW	S	odd	m	c	0	861
4	1	24	female	4	L	DW	L	even	c	c	1	634
4	1	24	female	4	L	DW	L	even	c	c	1	779
4	1	24	female	4	L	DW	L	even	c	m	0	1167
4	1	24	female	4	L	DW	L	even	c	c	1	697
4	1	24	female	4	L	DW	L	even	c	c	1	529
4	1	24	female	4	L	DW	L	even	c	c	1	636
4	1	24	female	4	L	DW	L	even	c	c	1	584
4	1	24	female	4	L	DW	L	even	c	c	1	894
4	1	24	female	4	L	DW	L	even	c	c	1	663
4	1	24	female	4	L	DW	L	even	c	c	1	1227
4	1	24	female	5	L	DW	L	odd	m	m	1	795
4	1	24	female	5	L	DW	L	odd	m	m	1	1097
4	1	24	female	5	L	DW	L	odd	m	m	1	760
4	1	24	female	5	L	DW	L	odd	m	m	1	851
4	1	24	female	5	L	DW	L	odd	m	m	1	651
4	1	24	female	5	L	DW	L	odd	m	m	1	838
4	1	24	female	5	L	DW	L	odd	m	m	1	1047
4	1	24	female	5	L	DW	L	odd	m	m	1	966
4	1	24	female	5	L	DW	L	odd	m	m	1	866
4	1	24	female	5	L	DW	L	odd	m	m	1	695
4	1	24	female	2	R	UP	S	even	c	c	1	1205
4	1	24	female	2	R	UP	S	even	c	c	1	647
4	1	24	female	2	R	UP	S	even	c	c	1	527
4	1	24	female	2	R	UP	S	even	c	c	1	550
4	1	24	female	2	R	UP	S	even	c	c	1	621
4	1	24	female	2	R	UP	S	even	c	c	1	2202
4	1	24	female	2	R	UP	S	even	c	c	1	548
4	1	24	female	2	R	UP	S	even	c	c	1	612
4	1	24	female	2	R	UP	S	even	c	c	1	630
4	1	24	female	2	R	UP	S	even	c	c	1	919
4	1	24	female	1	R	UP	S	odd	m	m	1	702
4	1	24	female	1	R	UP	S	odd	m	m	1	1326
4	1	24	female	1	R	UP	S	odd	m	m	1	836
4	1	24	female	1	R	UP	S	odd	m	m	1	805
4	1	24	female	1	R	UP	S	odd	m	m	1	735
4	1	24	female	1	R	UP	S	odd	m	m	1	960
4	1	24	female	1	R	UP	S	odd	m	m	1	691
4	1	24	female	1	R	UP	S	odd	m	m	1	547
4	1	24	female	1	R	UP	S	odd	m	m	1	518
4	1	24	female	1	R	UP	S	odd	m	m	1	734
4	1	24	female	4	R	UP	L	even	c	c	1	654
4	1	24	female	4	R	UP	L	even	c	c	1	631
4	1	24	female	4	R	UP	L	even	c	c	1	1217
4	1	24	female	4	R	UP	L	even	c	c	1	643
4	1	24	female	4	R	UP	L	even	c	c	1	1025
4	1	24	female	4	R	UP	L	even	c	c	1	1082
4	1	24	female	4	R	UP	L	even	c	c	1	522
4	1	24	female	4	R	UP	L	even	c	c	1	722
4	1	24	female	4	R	UP	L	even	c	c	1	716
4	1	24	female	4	R	UP	L	even	c	c	1	1326
4	1	24	female	5	R	UP	L	odd	m	m	1	757
4	1	24	female	5	R	UP	L	odd	m	m	1	878
4	1	24	female	5	R	UP	L	odd	m	m	1	615
4	1	24	female	5	R	UP	L	odd	m	m	1	1316
4	1	24	female	5	R	UP	L	odd	m	m	1	800
4	1	24	female	5	R	UP	L	odd	m	c	0	1501
4	1	24	female	5	R	UP	L	odd	m	m	1	516
4	1	24	female	5	R	UP	L	odd	m	m	1	505
4	1	24	female	5	R	UP	L	odd	m	m	1	697
4	1	24	female	5	R	UP	L	odd	m	m	1	767
4	1	24	female	2	R	DW	S	even	c	c	1	597
4	1	24	female	2	R	DW	S	even	c	c	1	1243
4	1	24	female	2	R	DW	S	even	c	c	1	686
4	1	24	female	2	R	DW	S	even	c	c	1	792
4	1	24	female	2	R	DW	S	even	c	c	1	631
4	1	24	female	2	R	DW	S	even	c	c	1	613
4	1	24	female	2	R	DW	S	even	c	c	1	840
4	1	24	female	2	R	DW	S	even	c	c	1	588
4	1	24	female	2	R	DW	S	even	c	c	1	850
4	1	24	female	2	R	DW	S	even	c	c	1	634
4	1	24	female	1	R	DW	S	odd	m	m	1	748
4	1	24	female	1	R	DW	S	odd	m	m	1	885
4	1	24	female	1	R	DW	S	odd	m	m	1	511
4	1	24	female	1	R	DW	S	odd	m	m	1	684
4	1	24	female	1	R	DW	S	odd	m	m	1	650
4	1	24	female	1	R	DW	S	odd	m	m	1	835
4	1	24	female	1	R	DW	S	odd	m	m	1	597
4	1	24	female	1	R	DW	S	odd	m	m	1	852
4	1	24	female	1	R	DW	S	odd	m	m	1	847
4	1	24	female	1	R	DW	S	odd	m	m	1	707
4	1	24	female	4	R	DW	L	even	c	c	1	682
4	1	24	female	4	R	DW	L	even	c	c	1	726
4	1	24	female	4	R	DW	L	even	c	c	1	1182
4	1	24	female	4	R	DW	L	even	c	c	1	1191
4	1	24	female	4	R	DW	L	even	c	c	1	713
4	1	24	female	4	R	DW	L	even	c	c	1	1250
4	1	24	female	4	R	DW	L	even	c	c	1	1140
4	1	24	female	4	R	DW	L	even	c	c	1	656
4	1	24	female	4	R	DW	L	even	c	c	1	1241
4	1	24	female	4	R	DW	L	even	c	c	1	826
4	1	24	female	5	R	DW	L	odd	m	m	1	672
4	1	24	female	5	R	DW	L	odd	m	m	1	608
4	1	24	female	5	R	DW	L	odd	m	m	1	1245
4	1	24	female	5	R	DW	L	odd	m	m	1	1092
4	1	24	female	5	R	DW	L	odd	m	m	1	573
4	1	24	female	5	R	DW	L	odd	m	m	1	1183
4	1	24	female	5	R	DW	L	odd	m	m	1	852
4	1	24	female	5	R	DW	L	odd	m	m	1	633
4	1	24	female	5	R	DW	L	odd	m	c	0	559
4	1	24	female	5	R	DW	L	odd	m	m	1	825
4	1	24	female	2	NO	NO	S	even	c	m	0	1267
4	1	24	female	2	NO	NO	S	even	c	c	1	743
4	1	24	female	2	NO	NO	S	even	c	c	1	1168
4	1	24	female	2	NO	NO	S	even	c	c	1	682
4	1	24	female	2	NO	NO	S	even	c	c	1	694
4	1	24	female	2	NO	NO	S	even	c	c	1	533
4	1	24	female	2	NO	NO	S	even	c	c	1	1125
4	1	24	female	2	NO	NO	S	even	c	c	1	773
4	1	24	female	2	NO	NO	S	even	c	c	1	921
4	1	24	female	2	NO	NO	S	even	c	c	1	541
4	1	24	female	1	NO	NO	S	odd	m	m	1	671
4	1	24	female	1	NO	NO	S	odd	m	m	1	722
4	1	24	female	1	NO	NO	S	odd	m	m	1	673
4	1	24	female	1	NO	NO	S	odd	m	c	0	789
4	1	24	female	1	NO	NO	S	odd	m	m	1	659
4	1	24	female	1	NO	NO	S	odd	m	c	0	509
4	1	24	female	1	NO	NO	S	odd	m	m	1	559
4	1	24	female	1	NO	NO	S	odd	m	m	1	471
4	1	24	female	1	NO	NO	S	odd	m	m	1	808
4	1	24	female	1	NO	NO	S	odd	m	m	1	496
4	1	24	female	4	NO	NO	L	even	c	c	1	563
4	1	24	female	4	NO	NO	L	even	c	c	1	1374
4	1	24	female	4	NO	NO	L	even	c	c	1	591
4	1	24	female	4	NO	NO	L	even	c	c	1	569
4	1	24	female	4	NO	NO	L	even	c	c	1	646
4	1	24	female	4	NO	NO	L	even	c	c	1	1788
4	1	24	female	4	NO	NO	L	even	c	c	1	660
4	1	24	female	4	NO	NO	L	even	c	c	1	688
4	1	24	female	4	NO	NO	L	even	c	c	1	616
4	1	24	female	4	NO	NO	L	even	c	c	1	933
4	1	24	female	5	NO	NO	L	odd	m	c	0	1322
4	1	24	female	5	NO	NO	L	odd	m	m	1	680
4	1	24	female	5	NO	NO	L	odd	m	m	1	782
4	1	24	female	5	NO	NO	L	odd	m	m	1	937
4	1	24	female	5	NO	NO	L	odd	m	m	1	510
4	1	24	female	5	NO	NO	L	odd	m	m	1	630
4	1	24	female	5	NO	NO	L	odd	m	m	1	769
4	1	24	female	5	NO	NO	L	odd	m	m	1	649
4	1	24	female	5	NO	NO	L	odd	m	m	1	494
4	1	24	female	5	NO	NO	L	odd	m	m	1	554
5	1	22	female	2	L	UP	S	even	c	c	1	538
5	1	22	female	2	L	UP	S	even	c	c	1	799
5	1	22	female	2	L	UP	S	even	c	c	1	523
5	1	22	female	2	L	UP	S	even	c	c	1	624
5	1	22	female	2	L	UP	S	even	c	c	1	591
5	1	22	female	2	L	UP	S	even	c	c	1	526
5	1	22	female	2	L	UP	S	even	c	c	1	548
5	1	22	female	2	L	UP	S	even	c	c	1	527
5	1	22	female	2	L	UP	S	even	c	c	1	577
5	1	22	female	2	L	UP	S	even	c	c	1	690
5	1	22	female	1	L	UP	S	odd	m	m	1	588
5	1	22	female	1	L	UP	S	odd	m	m	1	613
5	1	22	female	1	L	UP	S	odd	m	m	1	577
5	1	22	female	1	L	UP	S	odd	m	c	0	405
5	1	22	female	1	L	UP	S	odd	m	m	1	596
5	1	22	female	1	L	UP	S	odd	m	m	1	581
5	1	22	female	1	L	UP	S	odd	m	m	1	570
5	1	22	female	1	L	UP	S	odd	m	m	1	455
5	1	22	female	1	L	UP	S	odd	m	m	1	542
5	1	22	female	1	L	UP	S	odd	m	m	1	488
5	1	22	female	4	L	UP	L	even	c	c	1	549
5	1	22	female	4	L	UP	L	even	c	c	1	472
5	1	22	female	4	L	UP	L	even	c	c	1	488
5	1	22	female	4	L	UP	L	even	c	c	1	606
5	1	22	female	4	L	UP	L	even	c	c	1	550
5	1	22	female	4	L	UP	L	even	c	c	1	459
5	1	22	female	4	L	UP	L	even	c	c	1	462
5	1	22	female	4	L	UP	L	even	c	c	1	409
5	1	22	female	4	L	UP	L	even	c	c	1	512
5	1	22	female	4	L	UP	L	even	c	c	1	575
5	1	22	female	5	L	UP	L	odd	m	m	1	599
5	1	22	female	5	L	UP	L	odd	m	m	1	677
5	1	22	female	5	L	UP	L	odd	m	m	1	531
5	1	22	female	5	L	UP	L	odd	m	m	1	524
5	1	22	female	5	L	UP	L	odd	m	m	1	495
5	1	22	female	5	L	UP	L	odd	m	c	0	457
5	1	22	female	5	L	UP	L	odd	m	m	1	504
5	1	22	female	5	L	UP	L	odd	m	m	1	696
5	1	22	female	5	L	UP	L	odd	m	m	1	486
5	1	22	female	5	L	UP	L	odd	m	m	1	506
5	1	22	female	2	L	DW	S	even	c	c	1	680
5	1	22	female	2	L	DW	S	even	c	c	1	480
5	1	22	female	2	L	DW	S	even	c	c	1	573
5	1	22	female	2	L	DW	S	even	c	c	1	668
5	1	22	female	2	L	DW	S	even	c	c	1	618
5	1	22	female	2	L	DW	S	even	c	c	1	643
5	1	22	female	2	L	DW	S	even	c	c	1	601
5	1	22	female	2	L	DW	S	even	c	m	0	473
5	1	22	female	2	L	DW	S	even	c	c	1	1117
5	1	22	female	2	L	DW	S	even	c	c	1	498
5	1	22	female	1	L	DW	S	odd	m	m	1	557
5	1	22	female	1	L	DW	S	odd	m	m	1	555
5	1	22	female	1	L	DW	S	odd	m	m	1	545
5	1	22	female	1	L	DW	S	odd	m	m	1	559
5	1	22	female	1	L	DW	S	odd	m	m	1	509
5	1	22	female	1	L	DW	S	odd	m	m	1	450
5	1	22	female	1	L	DW	S	odd	m	m	1	498
5	1	22	female	1	L	DW	S	odd	m	m	1	625
5	1	22	female	1	L	DW	S	odd	m	m	1	512
5	1	22	female	1	L	DW	S	odd	m	m	1	501
5	1	22	female	4	L	DW	L	even	c	c	1	623
5	1	22	female	4	L	DW	L	even	c	c	1	502
5	1	22	female	4	L	DW	L	even	c	c	1	427
5	1	22	female	4	L	DW	L	even	c	c	1	529
5	1	22	female	4	L	DW	L	even	c	c	1	439
5	1	22	female	4	L	DW	L	even	c	c	1	509
5	1	22	female	4	L	DW	L	even	c	c	1	469
5	1	22	female	4	L	DW	L	even	c	c	1	443
5	1	22	female	4	L	DW	L	even	c	c	1	692
5	1	22	female	4	L	DW	L	even	c	c	1	528
5	1	22	female	5	L	DW	L	odd	m	m	1	615
5	1	22	female	5	L	DW	L	odd	m	m	1	588
5	1	22	female	5	L	DW	L	odd	m	m	1	581
5	1	22	female	5	L	DW	L	odd	m	m	1	596
5	1	22	female	5	L	DW	L	odd	m	m	1	882
5	1	22	female	5	L	DW	L	odd	m	m	1	554
5	1	22	female	5	L	DW	L	odd	m	m	1	465
5	1	22	female	5	L	DW	L	odd	m	m	1	513
5	1	22	female	5	L	DW	L	odd	m	m	1	643
5	1	22	female	5	L	DW	L	odd	m	m	1	603
5	1	22	female	2	R	UP	S	even	c	c	1	736
5	1	22	female	2	R	UP	S	even	c	c	1	814
5	1	22	female	2	R	UP	S	even	c	m	0	503
5	1	22	female	2	R	UP	S	even	c	c	1	480
5	1	22	female	2	R	UP	S	even	c	c	1	505
5	1	22	female	2	R	UP	S	even	c	c	1	559
5	1	22	female	2	R	UP	S	even	c	c	1	419
5	1	22	female	2	R	UP	S	even	c	c	1	457
5	1	22	female	2	R	UP	S	even	c	c	1	603
5	1	22	female	2	R	UP	S	even	c	c	1	579
5	1	22	female	1	R	UP	S	odd	m	m	1	783
5	1	22	female	1	R	UP	S	odd	m	m	1	544
5	1	22	female	1	R	UP	S	odd	m	m	1	537
5	1	22	female	1	R	UP	S	odd	m	m	1	495
5	1	22	female	1	R	UP	S	odd	m	m	1	462
5	1	22	female	1	R	UP	S	odd	m	m	1	480
5	1	22	female	1	R	UP	S	odd	m	m	1	455
5	1	22	female	1	R	UP	S	odd	m	m	1	552
5	1	22	female	1	R	UP	S	odd	m	m	1	628
5	1	22	female	1	R	UP	S	odd	m	m	1	779
5	1	22	female	4	R	UP	L	even	c	c	1	496
5	1	22	female	4	R	UP	L	even	c	c	1	497
5	1	22	female	4	R	UP	L	even	c	c	1	575
5	1	22	female	4	R	UP	L	even	c	c	1	516
5	1	22	female	4	R	UP	L	even	c	c	1	555
5	1	22	female	4	R	UP	L	even	c	c	1	433
5	1	22	female	4	R	UP	L	even	c	c	1	459
5	1	22	female	4	R	UP	L	even	c	c	1	458
5	1	22	female	4	R	UP	L	even	c	c	1	657
5	1	22	female	4	R	UP	L	even	c	c	1	514
5	1	22	female	5	R	UP	L	odd	m	m	1	676
5	1	22	female	5	R	UP	L	odd	m	m	1	672
5	1	22	female	5	R	UP	L	odd	m	m	1	658
5	1	22	female	5	R	UP	L	odd	m	m	1	426
5	1	22	female	5	R	UP	L	odd	m	m	1	497
5	1	22	female	5	R	UP	L	odd	m	m	1	485
5	1	22	female	5	R	UP	L	odd	m	m	1	1118
5	1	22	female	5	R	UP	L	odd	m	c	0	370
5	1	22	female	5	R	UP	L	odd	m	m	1	456
5	1	22	female	5	R	UP	L	odd	m	c	0	643
5	1	22	female	2	R	DW	S	even	c	c	1	788
5	1	22	female	2	R	DW	S	even	c	c	1	480
5	1	22	female	2	R	DW	S	even	c	c	1	457
5	1	22	female	2	R	DW	S	even	c	c	1	555
5	1	22	female	2	R	DW	S	even	c	c	1	530
5	1	22	female	2	R	DW	S	even	c	c	1	483
5	1	22	female	2	R	DW	S	even	c	c	1	493
5	1	22	female	2	R	DW	S	even	c	c	1	557
5	1	22	female	2	R	DW	S	even	c	m	0	990
5	1	22	female	2	R	DW	S	even	c	c	1	732
5	1	22	female	1	R	DW	S	odd	m	m	1	645
5	1	22	female	1	R	DW	S	odd	m	m	1	641
5	1	22	female	1	R	DW	S	odd	m	m	1	548
5	1	22	female	1	R	DW	S	odd	m	m	1	534
5	1	22	female	1	R	DW	S	odd	m	m	1	543
5	1	22	female	1	R	DW	S	odd	m	m	1	454
5	1	22	female	1	R	DW	S	odd	m	m	1	464
5	1	22	female	1	R	DW	S	odd	m	m	1	523
5	1	22	female	1	R	DW	S	odd	m	m	1	519
5	1	22	female	1	R	DW	S	odd	m	m	1	526
5	1	22	female	4	R	DW	L	even	c	c	1	631
5	1	22	female	4	R	DW	L	even	c	c	1	494
5	1	22	female	4	R	DW	L	even	c	c	1	512
5	1	22	female	4	R	DW	L	even	c	c	1	520
5	1	22	female	4	R	DW	L	even	c	c	1	443
5	1	22	female	4	R	DW	L	even	c	c	1	521
5	1	22	female	4	R	DW	L	even	c	c	1	563
5	1	22	female	4	R	DW	L	even	c	c	1	423
5	1	22	female	4	R	DW	L	even	c	c	1	517
5	1	22	female	4	R	DW	L	even	c	c	1	596
5	1	22	female	5	R	DW	L	odd	m	m	1	513
5	1	22	female	5	R	DW	L	odd	m	m	1	543
5	1	22	female	5	R	DW	L	odd	m	m	1	622
5	1	22	female	5	R	DW	L	odd	m	m	1	519
5	1	22	female	5	R	DW	L	odd	m	m	1	1058
5	1	22	female	5	R	DW	L	odd	m	m	1	623
5	1	22	female	5	R	DW	L	odd	m	m	1	486
5	1	22	female	5	R	DW	L	odd	m	m	1	418
5	1	22	female	5	R	DW	L	odd	m	m	1	1054
5	1	22	female	5	R	DW	L	odd	m	c	0	449
5	1	22	female	2	NO	NO	S	even	c	c	1	564
5	1	22	female	2	NO	NO	S	even	c	c	1	497
5	1	22	female	2	NO	NO	S	even	c	c	1	514
5	1	22	female	2	NO	NO	S	even	c	m	0	911
5	1	22	female	2	NO	NO	S	even	c	c	1	481
5	1	22	female	2	NO	NO	S	even	c	c	1	393
5	1	22	female	2	NO	NO	S	even	c	c	1	1306
5	1	22	female	2	NO	NO	S	even	c	c	1	391
5	1	22	female	2	NO	NO	S	even	c	c	1	449
5	1	22	female	2	NO	NO	S	even	c	c	1	577
5	1	22	female	1	NO	NO	S	odd	m	m	1	512
5	1	22	female	1	NO	NO	S	odd	m	m	1	470
5	1	22	female	1	NO	NO	S	odd	m	m	1	474
5	1	22	female	1	NO	NO	S	odd	m	m	1	502
5	1	22	female	1	NO	NO	S	odd	m	m	1	555
5	1	22	female	1	NO	NO	S	odd	m	m	1	417
5	1	22	female	1	NO	NO	S	odd	m	m	1	446
5	1	22	female	1	NO	NO	S	odd	m	m	1	426
5	1	22	female	1	NO	NO	S	odd	m	m	1	533
5	1	22	female	1	NO	NO	S	odd	m	m	1	902
5	1	22	female	4	NO	NO	L	even	c	c	1	669
5	1	22	female	4	NO	NO	L	even	c	c	1	546
5	1	22	female	4	NO	NO	L	even	c	c	1	512
5	1	22	female	4	NO	NO	L	even	c	c	1	647
5	1	22	female	4	NO	NO	L	even	c	c	1	406
5	1	22	female	4	NO	NO	L	even	c	c	1	522
5	1	22	female	4	NO	NO	L	even	c	c	1	422
5	1	22	female	4	NO	NO	L	even	c	c	1	413
5	1	22	female	4	NO	NO	L	even	c	c	1	500
5	1	22	female	4	NO	NO	L	even	c	c	1	452
5	1	22	female	5	NO	NO	L	odd	m	m	1	567
5	1	22	female	5	NO	NO	L	odd	m	m	1	628
5	1	22	female	5	NO	NO	L	odd	m	m	1	515
5	1	22	female	5	NO	NO	L	odd	m	c	0	430
5	1	22	female	5	NO	NO	L	odd	m	m	1	502
5	1	22	female	5	NO	NO	L	odd	m	m	1	477
5	1	22	female	5	NO	NO	L	odd	m	m	1	571
5	1	22	female	5	NO	NO	L	odd	m	m	1	647
5	1	22	female	5	NO	NO	L	odd	m	c	0	406
5	1	22	female	5	NO	NO	L	odd	m	m	1	569
6	1	24	female	2	L	UP	S	even	c	c	1	686
6	1	24	female	2	L	UP	S	even	c	c	1	1024
6	1	24	female	2	L	UP	S	even	c	c	1	561
6	1	24	female	2	L	UP	S	even	c	c	1	828
6	1	24	female	2	L	UP	S	even	c	c	1	832
6	1	24	female	2	L	UP	S	even	c	c	1	648
6	1	24	female	2	L	UP	S	even	c	c	1	736
6	1	24	female	2	L	UP	S	even	c	c	1	685
6	1	24	female	2	L	UP	S	even	c	c	1	702
6	1	24	female	2	L	UP	S	even	c	c	1	839
6	1	24	female	1	L	UP	S	odd	m	m	1	937
6	1	24	female	1	L	UP	S	odd	m	m	1	1390
6	1	24	female	1	L	UP	S	odd	m	m	1	594
6	1	24	female	1	L	UP	S	odd	m	c	0	615
6	1	24	female	1	L	UP	S	odd	m	m	1	584
6	1	24	female	1	L	UP	S	odd	m	m	1	685
6	1	24	female	1	L	UP	S	odd	m	m	1	661
6	1	24	female	1	L	UP	S	odd	m	m	1	828
6	1	24	female	1	L	UP	S	odd	m	m	1	788
6	1	24	female	1	L	UP	S	odd	m	m	1	956
6	1	24	female	4	L	UP	S	even	c	c	1	551
6	1	24	female	4	L	UP	S	even	c	c	1	629
6	1	24	female	4	L	UP	S	even	c	c	1	552
6	1	24	female	4	L	UP	S	even	c	c	1	548
6	1	24	female	4	L	UP	S	even	c	c	1	603
6	1	24	female	4	L	UP	S	even	c	c	1	725
6	1	24	female	4	L	UP	S	even	c	c	1	709
6	1	24	female	4	L	UP	S	even	c	c	1	768
6	1	24	female	4	L	UP	S	even	c	c	1	495
6	1	24	female	4	L	UP	S	even	c	c	1	885
6	1	24	female	5	L	UP	S	odd	m	m	1	606
6	1	24	female	5	L	UP	S	odd	m	m	1	681
6	1	24	female	5	L	UP	S	odd	m	m	1	615
6	1	24	female	5	L	UP	S	odd	m	m	1	1000
6	1	24	female	5	L	UP	S	odd	m	m	1	556
6	1	24	female	5	L	UP	S	odd	m	m	1	651
6	1	24	female	5	L	UP	S	odd	m	m	1	783
6	1	24	female	5	L	UP	S	odd	m	m	1	681
6	1	24	female	5	L	UP	S	odd	m	m	1	711
6	1	24	female	5	L	UP	S	odd	m	m	1	651
6	1	24	female	2	L	DW	S	even	c	c	1	1033
6	1	24	female	2	L	DW	S	even	c	c	1	578
6	1	24	female	2	L	DW	S	even	c	c	1	532
6	1	24	female	2	L	DW	S	even	c	c	1	689
6	1	24	female	2	L	DW	S	even	c	c	1	659
6	1	24	female	2	L	DW	S	even	c	c	1	581
6	1	24	female	2	L	DW	S	even	c	c	1	617
6	1	24	female	2	L	DW	S	even	c	c	1	823
6	1	24	female	2	L	DW	S	even	c	c	1	717
6	1	24	female	2	L	DW	S	even	c	c	1	813
6	1	24	female	1	L	DW	S	odd	m	m	1	644
6	1	24	female	1	L	DW	S	odd	m	m	1	747
6	1	24	female	1	L	DW	S	odd	m	m	1	1034
6	1	24	female	1	L	DW	S	odd	m	m	1	651
6	1	24	female	1	L	DW	S	odd	m	m	1	596
6	1	24	female	1	L	DW	S	odd	m	m	1	497
6	1	24	female	1	L	DW	S	odd	m	m	1	727
6	1	24	female	1	L	DW	S	odd	m	m	1	753
6	1	24	female	1	L	DW	S	odd	m	m	1	608
6	1	24	female	1	L	DW	S	odd	m	m	1	892
6	1	24	female	4	L	DW	S	even	c	c	1	1163
6	1	24	female	4	L	DW	S	even	c	c	1	879
6	1	24	female	4	L	DW	S	even	c	c	1	687
6	1	24	female	4	L	DW	S	even	c	c	1	918
6	1	24	female	4	L	DW	S	even	c	c	1	972
6	1	24	female	4	L	DW	S	even	c	c	1	592
6	1	24	female	4	L	DW	S	even	c	c	1	848
6	1	24	female	4	L	DW	S	even	c	c	1	649
6	1	24	female	4	L	DW	S	even	c	c	1	705
6	1	24	female	4	L	DW	S	even	c	c	1	803
6	1	24	female	5	L	DW	S	odd	m	m	1	713
6	1	24	female	5	L	DW	S	odd	m	m	1	756
6	1	24	female	5	L	DW	S	odd	m	m	1	580
6	1	24	female	5	L	DW	S	odd	m	m	1	570
6	1	24	female	5	L	DW	S	odd	m	m	1	681
6	1	24	female	5	L	DW	S	odd	m	m	1	685
6	1	24	female	5	L	DW	S	odd	m	m	1	624
6	1	24	female	5	L	DW	S	odd	m	m	1	784
6	1	24	female	5	L	DW	S	odd	m	m	1	655
6	1	24	female	5	L	DW	S	odd	m	m	1	823
6	1	24	female	2	R	UP	S	even	c	m	0	757
6	1	24	female	2	R	UP	S	even	c	c	1	608
6	1	24	female	2	R	UP	S	even	c	c	1	556
6	1	24	female	2	R	UP	S	even	c	c	1	754
6	1	24	female	2	R	UP	S	even	c	c	1	878
6	1	24	female	2	R	UP	S	even	c	c	1	717
6	1	24	female	2	R	UP	S	even	c	c	1	830
6	1	24	female	2	R	UP	S	even	c	c	1	720
6	1	24	female	2	R	UP	S	even	c	c	1	808
6	1	24	female	2	R	UP	S	even	c	c	1	700
6	1	24	female	1	R	UP	S	odd	m	m	1	693
6	1	24	female	1	R	UP	S	odd	m	m	1	841
6	1	24	female	1	R	UP	S	odd	m	m	1	986
6	1	24	female	1	R	UP	S	odd	m	m	1	637
6	1	24	female	1	R	UP	S	odd	m	m	1	559
6	1	24	female	1	R	UP	S	odd	m	m	1	750
6	1	24	female	1	R	UP	S	odd	m	m	1	865
6	1	24	female	1	R	UP	S	odd	m	m	1	597
6	1	24	female	1	R	UP	S	odd	m	m	1	764
6	1	24	female	1	R	UP	S	odd	m	m	1	761
6	1	24	female	4	R	UP	S	even	c	c	1	780
6	1	24	female	4	R	UP	S	even	c	c	1	922
6	1	24	female	4	R	UP	S	even	c	c	1	629
6	1	24	female	4	R	UP	S	even	c	c	1	555
6	1	24	female	4	R	UP	S	even	c	c	1	552
6	1	24	female	4	R	UP	S	even	c	c	1	651
6	1	24	female	4	R	UP	S	even	c	c	1	666
6	1	24	female	4	R	UP	S	even	c	c	1	707
6	1	24	female	4	R	UP	S	even	c	c	1	699
6	1	24	female	4	R	UP	S	even	c	c	1	760
6	1	24	female	5	R	UP	S	odd	m	m	1	1143
6	1	24	female	5	R	UP	S	odd	m	m	1	1015
6	1	24	female	5	R	UP	S	odd	m	m	1	642
6	1	24	female	5	R	UP	S	odd	m	m	1	890
6	1	24	female	5	R	UP	S	odd	m	m	1	1033
6	1	24	female	5	R	UP	S	odd	m	m	1	642
6	1	24	female	5	R	UP	S	odd	m	m	1	580
6	1	24	female	5	R	UP	S	odd	m	m	1	649
6	1	24	female	5	R	UP	S	odd	m	m	1	719
6	1	24	female	5	R	UP	S	odd	m	m	1	649
6	1	24	female	2	R	DW	S	even	c	c	1	1205
6	1	24	female	2	R	DW	S	even	c	c	1	656
6	1	24	female	2	R	DW	S	even	c	c	1	877
6	1	24	female	2	R	DW	S	even	c	c	1	1129
6	1	24	female	2	R	DW	S	even	c	c	1	555
6	1	24	female	2	R	DW	S	even	c	c	1	1216
6	1	24	female	2	R	DW	S	even	c	c	1	242
6	1	24	female	2	R	DW	S	even	c	c	1	783
6	1	24	female	2	R	DW	S	even	c	c	1	788
6	1	24	female	2	R	DW	S	even	c	c	1	532
6	1	24	female	1	R	DW	S	odd	m	m	1	1217
6	1	24	female	1	R	DW	S	odd	m	m	1	593
6	1	24	female	1	R	DW	S	odd	m	m	1	710
6	1	24	female	1	R	DW	S	odd	m	m	1	1089
6	1	24	female	1	R	DW	S	odd	m	m	1	584
6	1	24	female	1	R	DW	S	odd	m	m	1	564
6	1	24	female	1	R	DW	S	odd	m	m	1	731
6	1	24	female	1	R	DW	S	odd	m	m	1	694
6	1	24	female	1	R	DW	S	odd	m	m	1	874
6	1	24	female	1	R	DW	S	odd	m	m	1	732
6	1	24	female	4	R	DW	S	even	c	c	1	964
6	1	24	female	4	R	DW	S	even	c	c	1	773
6	1	24	female	4	R	DW	S	even	c	c	1	589
6	1	24	female	4	R	DW	S	even	c	c	1	578
6	1	24	female	4	R	DW	S	even	c	c	1	524
6	1	24	female	4	R	DW	S	even	c	c	1	609
6	1	24	female	4	R	DW	S	even	c	c	1	637
6	1	24	female	4	R	DW	S	even	c	c	1	760
6	1	24	female	4	R	DW	S	even	c	c	1	809
6	1	24	female	4	R	DW	S	even	c	m	0	806
6	1	24	female	5	R	DW	S	odd	m	m	1	1108
6	1	24	female	5	R	DW	S	odd	m	m	1	624
6	1	24	female	5	R	DW	S	odd	m	m	1	669
6	1	24	female	5	R	DW	S	odd	m	m	1	589
6	1	24	female	5	R	DW	S	odd	m	m	1	608
6	1	24	female	5	R	DW	S	odd	m	m	1	565
6	1	24	female	5	R	DW	S	odd	m	m	1	705
6	1	24	female	5	R	DW	S	odd	m	m	1	843
6	1	24	female	5	R	DW	S	odd	m	m	1	971
6	1	24	female	5	R	DW	S	odd	m	m	1	766
6	1	24	female	2	NO	NO	S	even	c	c	1	1307
6	1	24	female	2	NO	NO	S	even	c	c	1	1038
6	1	24	female	2	NO	NO	S	even	c	c	1	545
6	1	24	female	2	NO	NO	S	even	c	c	1	644
6	1	24	female	2	NO	NO	S	even	c	c	1	555
6	1	24	female	2	NO	NO	S	even	c	c	1	628
6	1	24	female	2	NO	NO	S	even	c	c	1	620
6	1	24	female	2	NO	NO	S	even	c	c	1	691
6	1	24	female	2	NO	NO	S	even	c	c	1	857
6	1	24	female	2	NO	NO	S	even	c	c	1	759
6	1	24	female	1	NO	NO	S	odd	m	m	1	901
6	1	24	female	1	NO	NO	S	odd	m	m	1	587
6	1	24	female	1	NO	NO	S	odd	m	m	1	688
6	1	24	female	1	NO	NO	S	odd	m	m	1	820
6	1	24	female	1	NO	NO	S	odd	m	m	1	485
6	1	24	female	1	NO	NO	S	odd	m	m	1	507
6	1	24	female	1	NO	NO	S	odd	m	m	1	900
6	1	24	female	1	NO	NO	S	odd	m	m	1	777
6	1	24	female	1	NO	NO	S	odd	m	m	1	728
6	1	24	female	1	NO	NO	S	odd	m	m	1	787
6	1	24	female	4	NO	NO	S	even	c	c	1	612
6	1	24	female	4	NO	NO	S	even	c	c	1	588
6	1	24	female	4	NO	NO	S	even	c	c	1	663
6	1	24	female	4	NO	NO	S	even	c	c	1	783
6	1	24	female	4	NO	NO	S	even	c	c	1	595
6	1	24	female	4	NO	NO	S	even	c	c	1	726
6	1	24	female	4	NO	NO	S	even	c	c	1	747
6	1	24	female	4	NO	NO	S	even	c	c	1	623
6	1	24	female	4	NO	NO	S	even	c	c	1	792
6	1	24	female	4	NO	NO	S	even	c	c	1	710
6	1	24	female	5	NO	NO	S	odd	m	m	1	1065
6	1	24	female	5	NO	NO	S	odd	m	m	1	613
6	1	24	female	5	NO	NO	S	odd	m	m	1	723
6	1	24	female	5	NO	NO	S	odd	m	m	1	549
6	1	24	female	5	NO	NO	S	odd	m	m	1	561
6	1	24	female	5	NO	NO	S	odd	m	m	1	598
6	1	24	female	5	NO	NO	S	odd	m	m	1	778
6	1	24	female	5	NO	NO	S	odd	m	m	1	1168
6	1	24	female	5	NO	NO	S	odd	m	m	1	847
6	1	24	female	5	NO	NO	S	odd	m	m	1	1140
7	1	21	female	2	L	UP	S	even	c	c	1	686
7	1	21	female	2	L	UP	S	even	c	c	1	845
7	1	21	female	2	L	UP	S	even	c	c	1	503
7	1	21	female	2	L	UP	S	even	c	c	1	547
7	1	21	female	2	L	UP	S	even	c	c	1	550
7	1	21	female	2	L	UP	S	even	c	c	1	627
7	1	21	female	2	L	UP	S	even	c	m	0	474
7	1	21	female	2	L	UP	S	even	c	c	1	477
7	1	21	female	2	L	UP	S	even	c	c	1	645
7	1	21	female	2	L	UP	S	even	c	c	1	455
7	1	21	female	1	L	UP	S	odd	m	m	1	1878
7	1	21	female	1	L	UP	S	odd	m	m	1	570
7	1	21	female	1	L	UP	S	odd	m	m	1	572
7	1	21	female	1	L	UP	S	odd	m	m	1	477
7	1	21	female	1	L	UP	S	odd	m	m	1	513
7	1	21	female	1	L	UP	S	odd	m	m	1	797
7	1	21	female	1	L	UP	S	odd	m	m	1	1074
7	1	21	female	1	L	UP	S	odd	m	m	1	493
7	1	21	female	1	L	UP	S	odd	m	m	1	537
7	1	21	female	1	L	UP	S	odd	m	m	1	524
7	1	21	female	4	L	UP	L	even	c	c	1	719
7	1	21	female	4	L	UP	L	even	c	c	1	503
7	1	21	female	4	L	UP	L	even	c	c	1	472
7	1	21	female	4	L	UP	L	even	c	c	1	396
7	1	21	female	4	L	UP	L	even	c	c	1	469
7	1	21	female	4	L	UP	L	even	c	c	1	397
7	1	21	female	4	L	UP	L	even	c	c	1	627
7	1	21	female	4	L	UP	L	even	c	c	1	494
7	1	21	female	4	L	UP	L	even	c	c	1	417
7	1	21	female	4	L	UP	L	even	c	c	1	487
7	1	21	female	5	L	UP	L	odd	m	m	1	702
7	1	21	female	5	L	UP	L	odd	m	m	1	677
7	1	21	female	5	L	UP	L	odd	m	m	1	536
7	1	21	female	5	L	UP	L	odd	m	m	1	480
7	1	21	female	5	L	UP	L	odd	m	m	1	520
7	1	21	female	5	L	UP	L	odd	m	m	1	464
7	1	21	female	5	L	UP	L	odd	m	m	1	514
7	1	21	female	5	L	UP	L	odd	m	m	1	567
7	1	21	female	5	L	UP	L	odd	m	m	1	922
7	1	21	female	5	L	UP	L	odd	m	m	1	522
7	1	21	female	2	L	DW	S	even	c	c	1	954
7	1	21	female	2	L	DW	S	even	c	c	1	623
7	1	21	female	2	L	DW	S	even	c	c	1	439
7	1	21	female	2	L	DW	S	even	c	c	1	509
7	1	21	female	2	L	DW	S	even	c	c	1	464
7	1	21	female	2	L	DW	S	even	c	c	1	450
7	1	21	female	2	L	DW	S	even	c	c	1	489
7	1	21	female	2	L	DW	S	even	c	c	1	518
7	1	21	female	2	L	DW	S	even	c	c	1	482
7	1	21	female	2	L	DW	S	even	c	c	1	501
7	1	21	female	1	L	DW	S	odd	m	m	1	1137
7	1	21	female	1	L	DW	S	odd	m	m	1	630
7	1	21	female	1	L	DW	S	odd	m	m	1	511
7	1	21	female	1	L	DW	S	odd	m	m	1	559
7	1	21	female	1	L	DW	S	odd	m	m	1	468
7	1	21	female	1	L	DW	S	odd	m	m	1	412
7	1	21	female	1	L	DW	S	odd	m	m	1	540
7	1	21	female	1	L	DW	S	odd	m	m	1	464
7	1	21	female	1	L	DW	S	odd	m	m	1	718
7	1	21	female	1	L	DW	S	odd	m	m	1	591
7	1	21	female	4	L	DW	L	even	c	c	1	914
7	1	21	female	4	L	DW	L	even	c	c	1	474
7	1	21	female	4	L	DW	L	even	c	c	1	550
7	1	21	female	4	L	DW	L	even	c	c	1	436
7	1	21	female	4	L	DW	L	even	c	c	1	531
7	1	21	female	4	L	DW	L	even	c	c	1	473
7	1	21	female	4	L	DW	L	even	c	c	1	542
7	1	21	female	4	L	DW	L	even	c	c	1	492
7	1	21	female	4	L	DW	L	even	c	c	1	535
7	1	21	female	4	L	DW	L	even	c	c	1	453
7	1	21	female	5	L	DW	L	odd	m	m	1	708
7	1	21	female	5	L	DW	L	odd	m	m	1	548
7	1	21	female	5	L	DW	L	odd	m	m	1	581
7	1	21	female	5	L	DW	L	odd	m	m	1	569
7	1	21	female	5	L	DW	L	odd	m	c	0	467
7	1	21	female	5	L	DW	L	odd	m	m	1	510
7	1	21	female	5	L	DW	L	odd	m	m	1	530
7	1	21	female	5	L	DW	L	odd	m	m	1	724
7	1	21	female	5	L	DW	L	odd	m	m	1	494
7	1	21	female	5	L	DW	L	odd	m	m	1	521
7	1	21	female	2	R	UP	S	even	c	c	1	666
7	1	21	female	2	R	UP	S	even	c	c	1	584
7	1	21	female	2	R	UP	S	even	c	c	1	770
7	1	21	female	2	R	UP	S	even	c	c	1	613
7	1	21	female	2	R	UP	S	even	c	c	1	570
7	1	21	female	2	R	UP	S	even	c	c	1	473
7	1	21	female	2	R	UP	S	even	c	c	1	535
7	1	21	female	2	R	UP	S	even	c	c	1	673
7	1	21	female	2	R	UP	S	even	c	m	0	456
7	1	21	female	2	R	UP	S	even	c	m	0	468
7	1	21	female	1	R	UP	S	odd	m	m	1	712
7	1	21	female	1	R	UP	S	odd	m	m	1	498
7	1	21	female	1	R	UP	S	odd	m	m	1	624
7	1	21	female	1	R	UP	S	odd	m	m	1	467
7	1	21	female	1	R	UP	S	odd	m	m	1	434
7	1	21	female	1	R	UP	S	odd	m	m	1	494
7	1	21	female	1	R	UP	S	odd	m	m	1	568
7	1	21	female	1	R	UP	S	odd	m	m	1	473
7	1	21	female	1	R	UP	S	odd	m	m	1	522
7	1	21	female	1	R	UP	S	odd	m	m	1	506
7	1	21	female	4	R	UP	L	even	c	c	1	847
7	1	21	female	4	R	UP	L	even	c	c	1	650
7	1	21	female	4	R	UP	L	even	c	c	1	515
7	1	21	female	4	R	UP	L	even	c	c	1	480
7	1	21	female	4	R	UP	L	even	c	c	1	665
7	1	21	female	4	R	UP	L	even	c	c	1	485
7	1	21	female	4	R	UP	L	even	c	c	1	431
7	1	21	female	4	R	UP	L	even	c	c	1	494
7	1	21	female	4	R	UP	L	even	c	c	1	473
7	1	21	female	4	R	UP	L	even	c	c	1	475
7	1	21	female	5	R	UP	L	odd	m	m	1	720
7	1	21	female	5	R	UP	L	odd	m	m	1	1087
7	1	21	female	5	R	UP	L	odd	m	m	1	498
7	1	21	female	5	R	UP	L	odd	m	m	1	546
7	1	21	female	5	R	UP	L	odd	m	m	1	765
7	1	21	female	5	R	UP	L	odd	m	m	1	625
7	1	21	female	5	R	UP	L	odd	m	m	1	550
7	1	21	female	5	R	UP	L	odd	m	m	1	531
7	1	21	female	5	R	UP	L	odd	m	m	1	495
7	1	21	female	5	R	UP	L	odd	m	m	1	568
7	1	21	female	2	R	DW	S	even	c	c	1	815
7	1	21	female	2	R	DW	S	even	c	c	1	936
7	1	21	female	2	R	DW	S	even	c	c	1	460
7	1	21	female	2	R	DW	S	even	c	c	1	538
7	1	21	female	2	R	DW	S	even	c	c	1	655
7	1	21	female	2	R	DW	S	even	c	c	1	453
7	1	21	female	2	R	DW	S	even	c	c	1	803
7	1	21	female	2	R	DW	S	even	c	c	1	499
7	1	21	female	2	R	DW	S	even	c	c	1	590
7	1	21	female	2	R	DW	S	even	c	c	1	443
7	1	21	female	1	R	DW	S	odd	m	m	1	822
7	1	21	female	1	R	DW	S	odd	m	m	1	614
7	1	21	female	1	R	DW	S	odd	m	m	1	491
7	1	21	female	1	R	DW	S	odd	m	m	1	633
7	1	21	female	1	R	DW	S	odd	m	m	1	466
7	1	21	female	1	R	DW	S	odd	m	m	1	590
7	1	21	female	1	R	DW	S	odd	m	m	1	420
7	1	21	female	1	R	DW	S	odd	m	m	1	451
7	1	21	female	1	R	DW	S	odd	m	m	1	569
7	1	21	female	1	R	DW	S	odd	m	m	1	468
7	1	21	female	4	R	DW	L	even	c	c	1	520
7	1	21	female	4	R	DW	L	even	c	c	1	974
7	1	21	female	4	R	DW	L	even	c	c	1	478
7	1	21	female	4	R	DW	L	even	c	c	1	508
7	1	21	female	4	R	DW	L	even	c	c	1	502
7	1	21	female	4	R	DW	L	even	c	c	1	472
7	1	21	female	4	R	DW	L	even	c	c	1	503
7	1	21	female	4	R	DW	L	even	c	c	1	531
7	1	21	female	4	R	DW	L	even	c	c	1	563
7	1	21	female	4	R	DW	L	even	c	c	1	412
7	1	21	female	5	R	DW	L	odd	m	m	1	837
7	1	21	female	5	R	DW	L	odd	m	m	1	583
7	1	21	female	5	R	DW	L	odd	m	m	1	538
7	1	21	female	5	R	DW	L	odd	m	m	1	630
7	1	21	female	5	R	DW	L	odd	m	m	1	570
7	1	21	female	5	R	DW	L	odd	m	m	1	513
7	1	21	female	5	R	DW	L	odd	m	m	1	453
7	1	21	female	5	R	DW	L	odd	m	m	1	740
7	1	21	female	5	R	DW	L	odd	m	m	1	693
7	1	21	female	5	R	DW	L	odd	m	m	1	568
7	1	21	female	2	NO	NO	S	even	c	c	1	1495
7	1	21	female	2	NO	NO	S	even	c	c	1	1400
7	1	21	female	2	NO	NO	S	even	c	c	1	459
7	1	21	female	2	NO	NO	S	even	c	c	1	599
7	1	21	female	2	NO	NO	S	even	c	c	1	464
7	1	21	female	2	NO	NO	S	even	c	c	1	460
7	1	21	female	2	NO	NO	S	even	c	c	1	517
7	1	21	female	2	NO	NO	S	even	c	c	1	415
7	1	21	female	2	NO	NO	S	even	c	c	1	559
7	1	21	female	2	NO	NO	S	even	c	c	1	611
7	1	21	female	1	NO	NO	S	odd	m	m	1	536
7	1	21	female	1	NO	NO	S	odd	m	m	1	480
7	1	21	female	1	NO	NO	S	odd	m	m	1	496
7	1	21	female	1	NO	NO	S	odd	m	m	1	653
7	1	21	female	1	NO	NO	S	odd	m	m	1	438
7	1	21	female	1	NO	NO	S	odd	m	m	1	448
7	1	21	female	1	NO	NO	S	odd	m	m	1	725
7	1	21	female	1	NO	NO	S	odd	m	m	1	696
7	1	21	female	1	NO	NO	S	odd	m	m	1	470
7	1	21	female	1	NO	NO	S	odd	m	m	1	408
7	1	21	female	4	NO	NO	L	even	c	c	1	843
7	1	21	female	4	NO	NO	L	even	c	c	1	1234
7	1	21	female	4	NO	NO	L	even	c	c	1	493
7	1	21	female	4	NO	NO	L	even	c	c	1	549
7	1	21	female	4	NO	NO	L	even	c	c	1	435
7	1	21	female	4	NO	NO	L	even	c	c	1	408
7	1	21	female	4	NO	NO	L	even	c	c	1	522
7	1	21	female	4	NO	NO	L	even	c	c	1	389
7	1	21	female	4	NO	NO	L	even	c	c	1	465
7	1	21	female	4	NO	NO	L	even	c	c	1	757
7	1	21	female	5	NO	NO	L	odd	m	c	0	1395
7	1	21	female	5	NO	NO	L	odd	m	m	1	668
7	1	21	female	5	NO	NO	L	odd	m	m	1	534
7	1	21	female	5	NO	NO	L	odd	m	m	1	529
7	1	21	female	5	NO	NO	L	odd	m	m	1	534
7	1	21	female	5	NO	NO	L	odd	m	m	1	537
7	1	21	female	5	NO	NO	L	odd	m	m	1	589
7	1	21	female	5	NO	NO	L	odd	m	m	1	585
7	1	21	female	5	NO	NO	L	odd	m	m	1	631
7	1	21	female	5	NO	NO	L	odd	m	m	1	478
8	1	23	female	2	L	UP	S	even	c	c	1	674
8	1	23	female	2	L	UP	S	even	c	c	1	775
8	1	23	female	2	L	UP	S	even	c	c	1	881
8	1	23	female	2	L	UP	S	even	c	c	1	563
8	1	23	female	2	L	UP	S	even	c	c	1	553
8	1	23	female	2	L	UP	S	even	c	c	1	620
8	1	23	female	2	L	UP	S	even	c	c	1	611
8	1	23	female	2	L	UP	S	even	c	c	1	576
8	1	23	female	2	L	UP	S	even	c	c	1	603
8	1	23	female	2	L	UP	S	even	c	c	1	544
8	1	23	female	1	L	UP	S	odd	m	m	1	544
8	1	23	female	1	L	UP	S	odd	m	m	1	734
8	1	23	female	1	L	UP	S	odd	m	m	1	777
8	1	23	female	1	L	UP	S	odd	m	m	1	859
8	1	23	female	1	L	UP	S	odd	m	m	1	511
8	1	23	female	1	L	UP	S	odd	m	m	1	571
8	1	23	female	1	L	UP	S	odd	m	m	1	469
8	1	23	female	1	L	UP	S	odd	m	m	1	494
8	1	23	female	1	L	UP	S	odd	m	m	1	516
8	1	23	female	1	L	UP	S	odd	m	m	1	595
8	1	23	female	4	L	UP	L	even	c	c	1	773
8	1	23	female	4	L	UP	L	even	c	c	1	687
8	1	23	female	4	L	UP	L	even	c	c	1	463
8	1	23	female	4	L	UP	L	even	c	c	1	724
8	1	23	female	4	L	UP	L	even	c	c	1	471
8	1	23	female	4	L	UP	L	even	c	c	1	401
8	1	23	female	4	L	UP	L	even	c	c	1	430
8	1	23	female	4	L	UP	L	even	c	c	1	452
8	1	23	female	4	L	UP	L	even	c	c	1	428
8	1	23	female	4	L	UP	L	even	c	c	1	496
8	1	23	female	5	L	UP	L	odd	m	m	1	1000
8	1	23	female	5	L	UP	L	odd	m	m	1	1041
8	1	23	female	5	L	UP	L	odd	m	m	1	634
8	1	23	female	5	L	UP	L	odd	m	m	1	696
8	1	23	female	5	L	UP	L	odd	m	m	1	748
8	1	23	female	5	L	UP	L	odd	m	m	1	605
8	1	23	female	5	L	UP	L	odd	m	m	1	1014
8	1	23	female	5	L	UP	L	odd	m	m	1	882
8	1	23	female	5	L	UP	L	odd	m	m	1	560
8	1	23	female	5	L	UP	L	odd	m	m	1	681
8	1	23	female	2	L	DW	S	even	c	c	1	724
8	1	23	female	2	L	DW	S	even	c	c	1	529
8	1	23	female	2	L	DW	S	even	c	c	1	634
8	1	23	female	2	L	DW	S	even	c	c	1	508
8	1	23	female	2	L	DW	S	even	c	c	1	489
8	1	23	female	2	L	DW	S	even	c	c	1	540
8	1	23	female	2	L	DW	S	even	c	c	1	680
8	1	23	female	2	L	DW	S	even	c	c	1	513
8	1	23	female	2	L	DW	S	even	c	c	1	551
8	1	23	female	2	L	DW	S	even	c	c	1	510
8	1	23	female	1	L	DW	S	odd	m	m	1	652
8	1	23	female	1	L	DW	S	odd	m	m	1	589
8	1	23	female	1	L	DW	S	odd	m	m	1	761
8	1	23	female	1	L	DW	S	odd	m	m	1	554
8	1	23	female	1	L	DW	S	odd	m	m	1	1554
8	1	23	female	1	L	DW	S	odd	m	m	1	849
8	1	23	female	1	L	DW	S	odd	m	m	1	586
8	1	23	female	1	L	DW	S	odd	m	m	1	617
8	1	23	female	1	L	DW	S	odd	m	m	1	459
8	1	23	female	1	L	DW	S	odd	m	m	1	446
8	1	23	female	4	L	DW	L	even	c	c	1	1664
8	1	23	female	4	L	DW	L	even	c	c	1	572
8	1	23	female	4	L	DW	L	even	c	c	1	592
8	1	23	female	4	L	DW	L	even	c	c	1	616
8	1	23	female	4	L	DW	L	even	c	c	1	498
8	1	23	female	4	L	DW	L	even	c	c	1	539
8	1	23	female	4	L	DW	L	even	c	c	1	546
8	1	23	female	4	L	DW	L	even	c	c	1	518
8	1	23	female	4	L	DW	L	even	c	c	1	555
8	1	23	female	4	L	DW	L	even	c	c	1	471
8	1	23	female	5	L	DW	L	odd	m	m	1	811
8	1	23	female	5	L	DW	L	odd	m	m	1	623
8	1	23	female	5	L	DW	L	odd	m	m	1	584
8	1	23	female	5	L	DW	L	odd	m	m	1	736
8	1	23	female	5	L	DW	L	odd	m	m	1	700
8	1	23	female	5	L	DW	L	odd	m	m	1	556
8	1	23	female	5	L	DW	L	odd	m	m	1	665
8	1	23	female	5	L	DW	L	odd	m	m	1	566
8	1	23	female	5	L	DW	L	odd	m	m	1	479
8	1	23	female	5	L	DW	L	odd	m	m	1	657
8	1	23	female	2	R	UP	S	even	c	c	1	584
8	1	23	female	2	R	UP	S	even	c	c	1	583
8	1	23	female	2	R	UP	S	even	c	c	1	608
8	1	23	female	2	R	UP	S	even	c	c	1	653
8	1	23	female	2	R	UP	S	even	c	c	1	568
8	1	23	female	2	R	UP	S	even	c	c	1	615
8	1	23	female	2	R	UP	S	even	c	c	1	690
8	1	23	female	2	R	UP	S	even	c	c	1	636
8	1	23	female	2	R	UP	S	even	c	c	1	536
8	1	23	female	2	R	UP	S	even	c	c	1	500
8	1	23	female	1	R	UP	S	odd	m	m	1	809
8	1	23	female	1	R	UP	S	odd	m	m	1	749
8	1	23	female	1	R	UP	S	odd	m	m	1	586
8	1	23	female	1	R	UP	S	odd	m	m	1	783
8	1	23	female	1	R	UP	S	odd	m	m	1	802
8	1	23	female	1	R	UP	S	odd	m	m	1	691
8	1	23	female	1	R	UP	S	odd	m	m	1	564
8	1	23	female	1	R	UP	S	odd	m	m	1	664
8	1	23	female	1	R	UP	S	odd	m	m	1	613
8	1	23	female	1	R	UP	S	odd	m	m	1	552
8	1	23	female	4	R	UP	L	even	c	c	1	819
8	1	23	female	4	R	UP	L	even	c	c	1	542
8	1	23	female	4	R	UP	L	even	c	c	1	690
8	1	23	female	4	R	UP	L	even	c	c	1	879
8	1	23	female	4	R	UP	L	even	c	c	1	461
8	1	23	female	4	R	UP	L	even	c	c	1	582
8	1	23	female	4	R	UP	L	even	c	c	1	417
8	1	23	female	4	R	UP	L	even	c	c	1	533
8	1	23	female	4	R	UP	L	even	c	c	1	456
8	1	23	female	4	R	UP	L	even	c	c	1	483
8	1	23	female	5	R	UP	L	odd	m	m	1	1693
8	1	23	female	5	R	UP	L	odd	m	m	1	659
8	1	23	female	5	R	UP	L	odd	m	m	1	638
8	1	23	female	5	R	UP	L	odd	m	m	1	1159
8	1	23	female	5	R	UP	L	odd	m	m	1	700
8	1	23	female	5	R	UP	L	odd	m	m	1	478
8	1	23	female	5	R	UP	L	odd	m	m	1	560
8	1	23	female	5	R	UP	L	odd	m	m	1	526
8	1	23	female	5	R	UP	L	odd	m	m	1	567
8	1	23	female	5	R	UP	L	odd	m	m	1	549
8	1	23	female	2	R	DW	S	even	c	c	1	610
8	1	23	female	2	R	DW	S	even	c	c	1	574
8	1	23	female	2	R	DW	S	even	c	c	1	883
8	1	23	female	2	R	DW	S	even	c	c	1	585
8	1	23	female	2	R	DW	S	even	c	c	1	678
8	1	23	female	2	R	DW	S	even	c	c	1	458
8	1	23	female	2	R	DW	S	even	c	c	1	526
8	1	23	female	2	R	DW	S	even	c	m	0	485
8	1	23	female	2	R	DW	S	even	c	c	1	520
8	1	23	female	2	R	DW	S	even	c	c	1	806
8	1	23	female	1	R	DW	S	odd	m	m	1	1333
8	1	23	female	1	R	DW	S	odd	m	m	1	843
8	1	23	female	1	R	DW	S	odd	m	m	1	943
8	1	23	female	1	R	DW	S	odd	m	m	1	529
8	1	23	female	1	R	DW	S	odd	m	m	1	1264
8	1	23	female	1	R	DW	S	odd	m	m	1	450
8	1	23	female	1	R	DW	S	odd	m	m	1	514
8	1	23	female	1	R	DW	S	odd	m	m	1	455
8	1	23	female	1	R	DW	S	odd	m	m	1	746
8	1	23	female	1	R	DW	S	odd	m	m	1	621
8	1	23	female	4	R	DW	L	even	c	c	1	1012
8	1	23	female	4	R	DW	L	even	c	c	1	511
8	1	23	female	4	R	DW	L	even	c	c	1	690
8	1	23	female	4	R	DW	L	even	c	c	1	766
8	1	23	female	4	R	DW	L	even	c	c	1	822
8	1	23	female	4	R	DW	L	even	c	c	1	511
8	1	23	female	4	R	DW	L	even	c	c	1	542
8	1	23	female	4	R	DW	L	even	c	c	1	553
8	1	23	female	4	R	DW	L	even	c	c	1	472
8	1	23	female	4	R	DW	L	even	c	c	1	547
8	1	23	female	5	R	DW	L	odd	m	m	1	3166
8	1	23	female	5	R	DW	L	odd	m	m	1	628
8	1	23	female	5	R	DW	L	odd	m	m	1	1317
8	1	23	female	5	R	DW	L	odd	m	m	1	983
8	1	23	female	5	R	DW	L	odd	m	m	1	671
8	1	23	female	5	R	DW	L	odd	m	m	1	619
8	1	23	female	5	R	DW	L	odd	m	m	1	617
8	1	23	female	5	R	DW	L	odd	m	m	1	668
8	1	23	female	5	R	DW	L	odd	m	m	1	516
8	1	23	female	5	R	DW	L	odd	m	m	1	555
8	1	23	female	2	NO	NO	S	even	c	c	1	519
8	1	23	female	2	NO	NO	S	even	c	c	1	621
8	1	23	female	2	NO	NO	S	even	c	c	1	637
8	1	23	female	2	NO	NO	S	even	c	c	1	501
8	1	23	female	2	NO	NO	S	even	c	c	1	428
8	1	23	female	2	NO	NO	S	even	c	c	1	606
8	1	23	female	2	NO	NO	S	even	c	c	1	838
8	1	23	female	2	NO	NO	S	even	c	c	1	605
8	1	23	female	2	NO	NO	S	even	c	c	1	562
8	1	23	female	2	NO	NO	S	even	c	c	1	673
8	1	23	female	1	NO	NO	S	odd	m	m	1	868
8	1	23	female	1	NO	NO	S	odd	m	m	1	659
8	1	23	female	1	NO	NO	S	odd	m	m	1	529
8	1	23	female	1	NO	NO	S	odd	m	m	1	597
8	1	23	female	1	NO	NO	S	odd	m	m	1	564
8	1	23	female	1	NO	NO	S	odd	m	m	1	538
8	1	23	female	1	NO	NO	S	odd	m	m	1	597
8	1	23	female	1	NO	NO	S	odd	m	m	1	517
8	1	23	female	1	NO	NO	S	odd	m	m	1	475
8	1	23	female	1	NO	NO	S	odd	m	m	1	457
8	1	23	female	4	NO	NO	L	even	c	c	1	765
8	1	23	female	4	NO	NO	L	even	c	c	1	509
8	1	23	female	4	NO	NO	L	even	c	c	1	630
8	1	23	female	4	NO	NO	L	even	c	c	1	486
8	1	23	female	4	NO	NO	L	even	c	c	1	657
8	1	23	female	4	NO	NO	L	even	c	c	1	425
8	1	23	female	4	NO	NO	L	even	c	c	1	502
8	1	23	female	4	NO	NO	L	even	c	c	1	640
8	1	23	female	4	NO	NO	L	even	c	c	1	434
8	1	23	female	4	NO	NO	L	even	c	c	1	886
8	1	23	female	5	NO	NO	L	odd	m	m	1	1712
8	1	23	female	5	NO	NO	L	odd	m	m	1	546
8	1	23	female	5	NO	NO	L	odd	m	c	0	429
8	1	23	female	5	NO	NO	L	odd	m	m	1	574
8	1	23	female	5	NO	NO	L	odd	m	m	1	850
8	1	23	female	5	NO	NO	L	odd	m	m	1	505
8	1	23	female	5	NO	NO	L	odd	m	m	1	567
8	1	23	female	5	NO	NO	L	odd	m	m	1	476
8	1	23	female	5	NO	NO	L	odd	m	m	1	486
8	1	23	female	5	NO	NO	L	odd	m	c	0	420
9	1	25	female	2	L	UP	S	even	c	c	1	577
9	1	25	female	2	L	UP	S	even	c	c	1	528
9	1	25	female	2	L	UP	S	even	c	c	1	710
9	1	25	female	2	L	UP	S	even	c	c	1	499
9	1	25	female	2	L	UP	S	even	c	c	1	618
9	1	25	female	2	L	UP	S	even	c	c	1	2300
9	1	25	female	2	L	UP	S	even	c	m	0	446
9	1	25	female	2	L	UP	S	even	c	c	1	553
9	1	25	female	2	L	UP	S	even	c	c	1	513
9	1	25	female	2	L	UP	S	even	c	c	1	631
9	1	25	female	1	L	UP	S	odd	m	m	1	611
9	1	25	female	1	L	UP	S	odd	m	m	1	489
9	1	25	female	1	L	UP	S	odd	m	m	1	501
9	1	25	female	1	L	UP	S	odd	m	m	1	587
9	1	25	female	1	L	UP	S	odd	m	m	1	861
9	1	25	female	1	L	UP	S	odd	m	m	1	512
9	1	25	female	1	L	UP	S	odd	m	m	1	451
9	1	25	female	1	L	UP	S	odd	m	m	1	1124
9	1	25	female	1	L	UP	S	odd	m	m	1	461
9	1	25	female	1	L	UP	S	odd	m	m	1	429
9	1	25	female	4	L	UP	L	even	c	c	1	567
9	1	25	female	4	L	UP	L	even	c	c	1	480
9	1	25	female	4	L	UP	L	even	c	c	1	456
9	1	25	female	4	L	UP	L	even	c	c	1	745
9	1	25	female	4	L	UP	L	even	c	c	1	623
9	1	25	female	4	L	UP	L	even	c	c	1	546
9	1	25	female	4	L	UP	L	even	c	c	1	412
9	1	25	female	4	L	UP	L	even	c	c	1	488
9	1	25	female	4	L	UP	L	even	c	c	1	437
9	1	25	female	4	L	UP	L	even	c	c	1	552
9	1	25	female	5	L	UP	L	odd	m	m	1	461
9	1	25	female	5	L	UP	L	odd	m	m	1	631
9	1	25	female	5	L	UP	L	odd	m	m	1	629
9	1	25	female	5	L	UP	L	odd	m	m	1	502
9	1	25	female	5	L	UP	L	odd	m	m	1	462
9	1	25	female	5	L	UP	L	odd	m	m	1	455
9	1	25	female	5	L	UP	L	odd	m	m	1	819
9	1	25	female	5	L	UP	L	odd	m	m	1	538
9	1	25	female	5	L	UP	L	odd	m	m	1	508
9	1	25	female	5	L	UP	L	odd	m	m	1	511
9	1	25	female	2	L	DW	S	even	c	c	1	505
9	1	25	female	2	L	DW	S	even	c	c	1	508
9	1	25	female	2	L	DW	S	even	c	c	1	564
9	1	25	female	2	L	DW	S	even	c	c	1	554
9	1	25	female	2	L	DW	S	even	c	c	1	989
9	1	25	female	2	L	DW	S	even	c	c	1	1092
9	1	25	female	2	L	DW	S	even	c	c	1	496
9	1	25	female	2	L	DW	S	even	c	c	1	580
9	1	25	female	2	L	DW	S	even	c	m	0	651
9	1	25	female	2	L	DW	S	even	c	c	1	676
9	1	25	female	1	L	DW	S	odd	m	m	1	521
9	1	25	female	1	L	DW	S	odd	m	m	1	580
9	1	25	female	1	L	DW	S	odd	m	m	1	483
9	1	25	female	1	L	DW	S	odd	m	m	1	545
9	1	25	female	1	L	DW	S	odd	m	m	1	640
9	1	25	female	1	L	DW	S	odd	m	m	1	526
9	1	25	female	1	L	DW	S	odd	m	m	1	617
9	1	25	female	1	L	DW	S	odd	m	m	1	482
9	1	25	female	1	L	DW	S	odd	m	m	1	404
9	1	25	female	1	L	DW	S	odd	m	m	1	695
9	1	25	female	4	L	DW	L	even	c	c	1	490
9	1	25	female	4	L	DW	L	even	c	c	1	464
9	1	25	female	4	L	DW	L	even	c	c	1	482
9	1	25	female	4	L	DW	L	even	c	c	1	531
9	1	25	female	4	L	DW	L	even	c	c	1	464
9	1	25	female	4	L	DW	L	even	c	c	1	555
9	1	25	female	4	L	DW	L	even	c	c	1	438
9	1	25	female	4	L	DW	L	even	c	c	1	548
9	1	25	female	4	L	DW	L	even	c	c	1	597
9	1	25	female	4	L	DW	L	even	c	c	1	475
9	1	25	female	5	L	DW	L	odd	m	m	1	785
9	1	25	female	5	L	DW	L	odd	m	m	1	782
9	1	25	female	5	L	DW	L	odd	m	m	1	744
9	1	25	female	5	L	DW	L	odd	m	m	1	544
9	1	25	female	5	L	DW	L	odd	m	m	1	741
9	1	25	female	5	L	DW	L	odd	m	m	1	544
9	1	25	female	5	L	DW	L	odd	m	m	1	511
9	1	25	female	5	L	DW	L	odd	m	m	1	638
9	1	25	female	5	L	DW	L	odd	m	m	1	541
9	1	25	female	5	L	DW	L	odd	m	m	1	553
9	1	25	female	2	R	UP	S	even	c	c	1	509
9	1	25	female	2	R	UP	S	even	c	c	1	657
9	1	25	female	2	R	UP	S	even	c	c	1	496
9	1	25	female	2	R	UP	S	even	c	c	1	622
9	1	25	female	2	R	UP	S	even	c	c	1	628
9	1	25	female	2	R	UP	S	even	c	c	1	587
9	1	25	female	2	R	UP	S	even	c	c	1	453
9	1	25	female	2	R	UP	S	even	c	c	1	538
9	1	25	female	2	R	UP	S	even	c	c	1	491
9	1	25	female	2	R	UP	S	even	c	m	0	372
9	1	25	female	1	R	UP	S	odd	m	m	1	508
9	1	25	female	1	R	UP	S	odd	m	m	1	737
9	1	25	female	1	R	UP	S	odd	m	m	1	614
9	1	25	female	1	R	UP	S	odd	m	m	1	445
9	1	25	female	1	R	UP	S	odd	m	m	1	1068
9	1	25	female	1	R	UP	S	odd	m	m	1	441
9	1	25	female	1	R	UP	S	odd	m	m	1	607
9	1	25	female	1	R	UP	S	odd	m	m	1	706
9	1	25	female	1	R	UP	S	odd	m	m	1	699
9	1	25	female	1	R	UP	S	odd	m	m	1	513
9	1	25	female	4	R	UP	L	even	c	c	1	762
9	1	25	female	4	R	UP	L	even	c	c	1	568
9	1	25	female	4	R	UP	L	even	c	c	1	490
9	1	25	female	4	R	UP	L	even	c	c	1	481
9	1	25	female	4	R	UP	L	even	c	c	1	501
9	1	25	female	4	R	UP	L	even	c	c	1	681
9	1	25	female	4	R	UP	L	even	c	c	1	502
9	1	25	female	4	R	UP	L	even	c	c	1	478
9	1	25	female	4	R	UP	L	even	c	c	1	475
9	1	25	female	4	R	UP	L	even	c	c	1	496
9	1	25	female	5	R	UP	L	odd	m	m	1	813
9	1	25	female	5	R	UP	L	odd	m	m	1	801
9	1	25	female	5	R	UP	L	odd	m	m	1	582
9	1	25	female	5	R	UP	L	odd	m	m	1	571
9	1	25	female	5	R	UP	L	odd	m	m	1	524
9	1	25	female	5	R	UP	L	odd	m	m	1	507
9	1	25	female	5	R	UP	L	odd	m	m	1	954
9	1	25	female	5	R	UP	L	odd	m	m	1	616
9	1	25	female	5	R	UP	L	odd	m	m	1	556
9	1	25	female	5	R	UP	L	odd	m	m	1	525
9	1	25	female	2	R	DW	S	even	c	c	1	521
9	1	25	female	2	R	DW	S	even	c	c	1	560
9	1	25	female	2	R	DW	S	even	c	c	1	726
9	1	25	female	2	R	DW	S	even	c	c	1	554
9	1	25	female	2	R	DW	S	even	c	c	1	588
9	1	25	female	2	R	DW	S	even	c	c	1	923
9	1	25	female	2	R	DW	S	even	c	c	1	518
9	1	25	female	2	R	DW	S	even	c	c	1	519
9	1	25	female	2	R	DW	S	even	c	c	1	549
9	1	25	female	2	R	DW	S	even	c	m	0	761
9	1	25	female	1	R	DW	S	odd	m	m	1	464
9	1	25	female	1	R	DW	S	odd	m	m	1	650
9	1	25	female	1	R	DW	S	odd	m	m	1	455
9	1	25	female	1	R	DW	S	odd	m	m	1	478
9	1	25	female	1	R	DW	S	odd	m	m	1	1660
9	1	25	female	1	R	DW	S	odd	m	m	1	571
9	1	25	female	1	R	DW	S	odd	m	m	1	632
9	1	25	female	1	R	DW	S	odd	m	m	1	559
9	1	25	female	1	R	DW	S	odd	m	m	1	566
9	1	25	female	1	R	DW	S	odd	m	m	1	437
9	1	25	female	4	R	DW	L	even	c	c	1	502
9	1	25	female	4	R	DW	L	even	c	c	1	477
9	1	25	female	4	R	DW	L	even	c	c	1	494
9	1	25	female	4	R	DW	L	even	c	c	1	796
9	1	25	female	4	R	DW	L	even	c	c	1	1071
9	1	25	female	4	R	DW	L	even	c	c	1	471
9	1	25	female	4	R	DW	L	even	c	c	1	512
9	1	25	female	4	R	DW	L	even	c	c	1	450
9	1	25	female	4	R	DW	L	even	c	c	1	467
9	1	25	female	4	R	DW	L	even	c	c	1	582
9	1	25	female	5	R	DW	L	odd	m	m	1	486
9	1	25	female	5	R	DW	L	odd	m	m	1	593
9	1	25	female	5	R	DW	L	odd	m	m	1	429
9	1	25	female	5	R	DW	L	odd	m	m	1	814
9	1	25	female	5	R	DW	L	odd	m	m	1	631
9	1	25	female	5	R	DW	L	odd	m	m	1	632
9	1	25	female	5	R	DW	L	odd	m	m	1	570
9	1	25	female	5	R	DW	L	odd	m	m	1	577
9	1	25	female	5	R	DW	L	odd	m	m	1	520
9	1	25	female	5	R	DW	L	odd	m	m	1	508
9	1	25	female	2	NO	NO	S	even	c	c	1	571
9	1	25	female	2	NO	NO	S	even	c	c	1	453
9	1	25	female	2	NO	NO	S	even	c	c	1	714
9	1	25	female	2	NO	NO	S	even	c	c	1	513
9	1	25	female	2	NO	NO	S	even	c	c	1	422
9	1	25	female	2	NO	NO	S	even	c	c	1	449
9	1	25	female	2	NO	NO	S	even	c	c	1	570
9	1	25	female	2	NO	NO	S	even	c	c	1	838
9	1	25	female	2	NO	NO	S	even	c	c	1	595
9	1	25	female	2	NO	NO	S	even	c	c	1	475
9	1	25	female	1	NO	NO	S	odd	m	m	1	484
9	1	25	female	1	NO	NO	S	odd	m	m	1	558
9	1	25	female	1	NO	NO	S	odd	m	m	1	460
9	1	25	female	1	NO	NO	S	odd	m	m	1	524
9	1	25	female	1	NO	NO	S	odd	m	m	1	594
9	1	25	female	1	NO	NO	S	odd	m	m	1	461
9	1	25	female	1	NO	NO	S	odd	m	m	1	507
9	1	25	female	1	NO	NO	S	odd	m	m	1	514
9	1	25	female	1	NO	NO	S	odd	m	m	1	451
9	1	25	female	1	NO	NO	S	odd	m	m	1	384
9	1	25	female	4	NO	NO	L	even	c	c	1	594
9	1	25	female	4	NO	NO	L	even	c	c	1	688
9	1	25	female	4	NO	NO	L	even	c	c	1	1230
9	1	25	female	4	NO	NO	L	even	c	c	1	497
9	1	25	female	4	NO	NO	L	even	c	c	1	374
9	1	25	female	4	NO	NO	L	even	c	c	1	476
9	1	25	female	4	NO	NO	L	even	c	c	1	665
9	1	25	female	4	NO	NO	L	even	c	c	1	469
9	1	25	female	4	NO	NO	L	even	c	c	1	435
9	1	25	female	4	NO	NO	L	even	c	c	1	467
9	1	25	female	5	NO	NO	L	odd	m	m	1	627
9	1	25	female	5	NO	NO	L	odd	m	m	1	492
9	1	25	female	5	NO	NO	L	odd	m	m	1	779
9	1	25	female	5	NO	NO	L	odd	m	m	1	925
9	1	25	female	5	NO	NO	L	odd	m	m	1	615
9	1	25	female	5	NO	NO	L	odd	m	m	1	825
9	1	25	female	5	NO	NO	L	odd	m	m	1	584
9	1	25	female	5	NO	NO	L	odd	m	m	1	490
9	1	25	female	5	NO	NO	L	odd	m	c	0	441
9	1	25	female	5	NO	NO	L	odd	m	m	1	533
10	1	25	female	2	L	UP	S	even	c	c	1	721
10	1	25	female	2	L	UP	S	even	c	c	1	1213
10	1	25	female	2	L	UP	S	even	c	c	1	507
10	1	25	female	2	L	UP	S	even	c	c	1	831
10	1	25	female	2	L	UP	S	even	c	c	1	416
10	1	25	female	2	L	UP	S	even	c	c	1	547
10	1	25	female	2	L	UP	S	even	c	c	1	616
10	1	25	female	2	L	UP	S	even	c	c	1	482
10	1	25	female	2	L	UP	S	even	c	c	1	499
10	1	25	female	2	L	UP	S	even	c	c	1	420
10	1	25	female	1	L	UP	S	odd	m	m	1	772
10	1	25	female	1	L	UP	S	odd	m	m	1	744
10	1	25	female	1	L	UP	S	odd	m	m	1	1434
10	1	25	female	1	L	UP	S	odd	m	m	1	624
10	1	25	female	1	L	UP	S	odd	m	m	1	486
10	1	25	female	1	L	UP	S	odd	m	m	1	523
10	1	25	female	1	L	UP	S	odd	m	m	1	538
10	1	25	female	1	L	UP	S	odd	m	m	1	607
10	1	25	female	1	L	UP	S	odd	m	c	0	592
10	1	25	female	1	L	UP	S	odd	m	m	1	504
10	1	25	female	4	L	UP	L	even	c	m	0	791
10	1	25	female	4	L	UP	L	even	c	c	1	410
10	1	25	female	4	L	UP	L	even	c	c	1	787
10	1	25	female	4	L	UP	L	even	c	c	1	471
10	1	25	female	4	L	UP	L	even	c	c	1	452
10	1	25	female	4	L	UP	L	even	c	c	1	484
10	1	25	female	4	L	UP	L	even	c	c	1	540
10	1	25	female	4	L	UP	L	even	c	c	1	473
10	1	25	female	4	L	UP	L	even	c	c	1	491
10	1	25	female	4	L	UP	L	even	c	c	1	480
10	1	25	female	5	L	UP	L	odd	m	m	1	663
10	1	25	female	5	L	UP	L	odd	m	m	1	614
10	1	25	female	5	L	UP	L	odd	m	m	1	724
10	1	25	female	5	L	UP	L	odd	m	m	1	525
10	1	25	female	5	L	UP	L	odd	m	m	1	600
10	1	25	female	5	L	UP	L	odd	m	m	1	558
10	1	25	female	5	L	UP	L	odd	m	m	1	560
10	1	25	female	5	L	UP	L	odd	m	m	1	522
10	1	25	female	5	L	UP	L	odd	m	m	1	811
10	1	25	female	5	L	UP	L	odd	m	m	1	520
10	1	25	female	2	L	DW	S	even	c	c	1	725
10	1	25	female	2	L	DW	S	even	c	c	1	524
10	1	25	female	2	L	DW	S	even	c	c	1	562
10	1	25	female	2	L	DW	S	even	c	c	1	739
10	1	25	female	2	L	DW	S	even	c	m	0	470
10	1	25	female	2	L	DW	S	even	c	c	1	541
10	1	25	female	2	L	DW	S	even	c	c	1	486
10	1	25	female	2	L	DW	S	even	c	c	1	525
10	1	25	female	2	L	DW	S	even	c	m	0	445
10	1	25	female	2	L	DW	S	even	c	c	1	467
10	1	25	female	1	L	DW	S	odd	m	m	1	677
10	1	25	female	1	L	DW	S	odd	m	m	1	741
10	1	25	female	1	L	DW	S	odd	m	m	1	541
10	1	25	female	1	L	DW	S	odd	m	m	1	439
10	1	25	female	1	L	DW	S	odd	m	m	1	415
10	1	25	female	1	L	DW	S	odd	m	m	1	441
10	1	25	female	1	L	DW	S	odd	m	m	1	589
10	1	25	female	1	L	DW	S	odd	m	m	1	497
10	1	25	female	1	L	DW	S	odd	m	m	1	530
10	1	25	female	1	L	DW	S	odd	m	m	1	513
10	1	25	female	4	L	DW	L	even	c	m	0	737
10	1	25	female	4	L	DW	L	even	c	c	1	534
10	1	25	female	4	L	DW	L	even	c	c	1	519
10	1	25	female	4	L	DW	L	even	c	c	1	445
10	1	25	female	4	L	DW	L	even	c	c	1	386
10	1	25	female	4	L	DW	L	even	c	c	1	386
10	1	25	female	4	L	DW	L	even	c	c	1	472
10	1	25	female	4	L	DW	L	even	c	c	1	430
10	1	25	female	4	L	DW	L	even	c	c	1	463
10	1	25	female	4	L	DW	L	even	c	c	1	442
10	1	25	female	5	L	DW	L	odd	m	m	1	527
10	1	25	female	5	L	DW	L	odd	m	m	1	501
10	1	25	female	5	L	DW	L	odd	m	m	1	727
10	1	25	female	5	L	DW	L	odd	m	m	1	563
10	1	25	female	5	L	DW	L	odd	m	m	1	543
10	1	25	female	5	L	DW	L	odd	m	m	1	497
10	1	25	female	5	L	DW	L	odd	m	m	1	552
10	1	25	female	5	L	DW	L	odd	m	m	1	533
10	1	25	female	5	L	DW	L	odd	m	m	1	452
10	1	25	female	5	L	DW	L	odd	m	m	1	441
10	1	25	female	2	R	UP	S	even	c	c	1	702
10	1	25	female	2	R	UP	S	even	c	c	1	623
10	1	25	female	2	R	UP	S	even	c	c	1	1245
10	1	25	female	2	R	UP	S	even	c	c	1	501
10	1	25	female	2	R	UP	S	even	c	c	1	474
10	1	25	female	2	R	UP	S	even	c	c	1	617
10	1	25	female	2	R	UP	S	even	c	c	1	521
10	1	25	female	2	R	UP	S	even	c	c	1	628
10	1	25	female	2	R	UP	S	even	c	m	0	431
10	1	25	female	2	R	UP	S	even	c	c	1	527
10	1	25	female	1	R	UP	S	odd	m	m	1	834
10	1	25	female	1	R	UP	S	odd	m	m	1	758
10	1	25	female	1	R	UP	S	odd	m	m	1	1113
10	1	25	female	1	R	UP	S	odd	m	m	1	546
10	1	25	female	1	R	UP	S	odd	m	m	1	566
10	1	25	female	1	R	UP	S	odd	m	m	1	489
10	1	25	female	1	R	UP	S	odd	m	m	1	583
10	1	25	female	1	R	UP	S	odd	m	m	1	518
10	1	25	female	1	R	UP	S	odd	m	m	1	590
10	1	25	female	1	R	UP	S	odd	m	m	1	634
10	1	25	female	4	R	UP	L	even	c	c	1	1605
10	1	25	female	4	R	UP	L	even	c	c	1	581
10	1	25	female	4	R	UP	L	even	c	c	1	558
10	1	25	female	4	R	UP	L	even	c	c	1	501
10	1	25	female	4	R	UP	L	even	c	c	1	423
10	1	25	female	4	R	UP	L	even	c	c	1	434
10	1	25	female	4	R	UP	L	even	c	c	1	487
10	1	25	female	4	R	UP	L	even	c	c	1	392
10	1	25	female	4	R	UP	L	even	c	c	1	407
10	1	25	female	4	R	UP	L	even	c	c	1	450
10	1	25	female	5	R	UP	L	odd	m	m	1	543
10	1	25	female	5	R	UP	L	odd	m	m	1	540
10	1	25	female	5	R	UP	L	odd	m	m	1	1863
10	1	25	female	5	R	UP	L	odd	m	m	1	524
10	1	25	female	5	R	UP	L	odd	m	m	1	525
10	1	25	female	5	R	UP	L	odd	m	m	1	505
10	1	25	female	5	R	UP	L	odd	m	m	1	492
10	1	25	female	5	R	UP	L	odd	m	m	1	671
10	1	25	female	5	R	UP	L	odd	m	m	1	472
10	1	25	female	5	R	UP	L	odd	m	m	1	661
10	1	25	female	2	R	DW	S	even	c	c	1	523
10	1	25	female	2	R	DW	S	even	c	c	1	542
10	1	25	female	2	R	DW	S	even	c	c	1	656
10	1	25	female	2	R	DW	S	even	c	c	1	503
10	1	25	female	2	R	DW	S	even	c	c	1	458
10	1	25	female	2	R	DW	S	even	c	c	1	471
10	1	25	female	2	R	DW	S	even	c	c	1	985
10	1	25	female	2	R	DW	S	even	c	c	1	549
10	1	25	female	2	R	DW	S	even	c	c	1	547
10	1	25	female	2	R	DW	S	even	c	c	1	446
10	1	25	female	1	R	DW	S	odd	m	m	1	724
10	1	25	female	1	R	DW	S	odd	m	m	1	525
10	1	25	female	1	R	DW	S	odd	m	m	1	1030
10	1	25	female	1	R	DW	S	odd	m	m	1	483
10	1	25	female	1	R	DW	S	odd	m	m	1	492
10	1	25	female	1	R	DW	S	odd	m	c	0	428
10	1	25	female	1	R	DW	S	odd	m	m	1	1126
10	1	25	female	1	R	DW	S	odd	m	m	1	546
10	1	25	female	1	R	DW	S	odd	m	m	1	471
10	1	25	female	1	R	DW	S	odd	m	m	1	426
10	1	25	female	4	R	DW	L	even	c	c	1	834
10	1	25	female	4	R	DW	L	even	c	c	1	540
10	1	25	female	4	R	DW	L	even	c	c	1	585
10	1	25	female	4	R	DW	L	even	c	c	1	443
10	1	25	female	4	R	DW	L	even	c	c	1	389
10	1	25	female	4	R	DW	L	even	c	c	1	513
10	1	25	female	4	R	DW	L	even	c	c	1	454
10	1	25	female	4	R	DW	L	even	c	c	1	507
10	1	25	female	4	R	DW	L	even	c	c	1	502
10	1	25	female	4	R	DW	L	even	c	c	1	452
10	1	25	female	5	R	DW	L	odd	m	m	1	637
10	1	25	female	5	R	DW	L	odd	m	m	1	549
10	1	25	female	5	R	DW	L	odd	m	m	1	549
10	1	25	female	5	R	DW	L	odd	m	m	1	631
10	1	25	female	5	R	DW	L	odd	m	m	1	621
10	1	25	female	5	R	DW	L	odd	m	m	1	500
10	1	25	female	5	R	DW	L	odd	m	m	1	563
10	1	25	female	5	R	DW	L	odd	m	m	1	829
10	1	25	female	5	R	DW	L	odd	m	m	1	696
10	1	25	female	5	R	DW	L	odd	m	m	1	541
10	1	25	female	2	NO	NO	S	even	c	c	1	553
10	1	25	female	2	NO	NO	S	even	c	c	1	943
10	1	25	female	2	NO	NO	S	even	c	c	1	502
10	1	25	female	2	NO	NO	S	even	c	c	1	532
10	1	25	female	2	NO	NO	S	even	c	c	1	531
10	1	25	female	2	NO	NO	S	even	c	c	1	501
10	1	25	female	2	NO	NO	S	even	c	c	1	480
10	1	25	female	2	NO	NO	S	even	c	c	1	422
10	1	25	female	2	NO	NO	S	even	c	c	1	529
10	1	25	female	2	NO	NO	S	even	c	c	1	466
10	1	25	female	1	NO	NO	S	odd	m	m	1	766
10	1	25	female	1	NO	NO	S	odd	m	m	1	612
10	1	25	female	1	NO	NO	S	odd	m	m	1	534
10	1	25	female	1	NO	NO	S	odd	m	m	1	529
10	1	25	female	1	NO	NO	S	odd	m	m	1	428
10	1	25	female	1	NO	NO	S	odd	m	m	1	743
10	1	25	female	1	NO	NO	S	odd	m	m	1	456
10	1	25	female	1	NO	NO	S	odd	m	m	1	539
10	1	25	female	1	NO	NO	S	odd	m	m	1	1113
10	1	25	female	1	NO	NO	S	odd	m	m	1	528
10	1	25	female	4	NO	NO	L	even	c	c	1	480
10	1	25	female	4	NO	NO	L	even	c	c	1	434
10	1	25	female	4	NO	NO	L	even	c	c	1	607
10	1	25	female	4	NO	NO	L	even	c	c	1	787
10	1	25	female	4	NO	NO	L	even	c	c	1	386
10	1	25	female	4	NO	NO	L	even	c	c	1	387
10	1	25	female	4	NO	NO	L	even	c	c	1	429
10	1	25	female	4	NO	NO	L	even	c	c	1	382
10	1	25	female	4	NO	NO	L	even	c	c	1	426
10	1	25	female	4	NO	NO	L	even	c	c	1	451
10	1	25	female	5	NO	NO	L	odd	m	m	1	571
10	1	25	female	5	NO	NO	L	odd	m	m	1	517
10	1	25	female	5	NO	NO	L	odd	m	m	1	954
10	1	25	female	5	NO	NO	L	odd	m	m	1	481
10	1	25	female	5	NO	NO	L	odd	m	m	1	936
10	1	25	female	5	NO	NO	L	odd	m	m	1	714
10	1	25	female	5	NO	NO	L	odd	m	m	1	532
10	1	25	female	5	NO	NO	L	odd	m	m	1	560
10	1	25	female	5	NO	NO	L	odd	m	m	1	555
[truncated: 17,201 more rows]
